# In-depth characterization of denitrifier communities across different soil ecosystems in the tundra

Igor S. Pessi<sup>1,2</sup>, Sirja Viitamäki<sup>1</sup>, Anna-Maria Virkkala<sup>3,4</sup>, Eeva Eronen-Rasimus<sup>1,5</sup>,  
Tom O. Delmont<sup>6</sup>, Maija E. Marushchak<sup>7,8</sup>, Miska Luoto<sup>3</sup>, and Jenni Hultman<sup>1,2,9,\*</sup>

<sup>1</sup>Department of Microbiology, University of Helsinki, Helsinki, Finland; <sup>2</sup>Helsinki Institute of Sustainability Science (HELSUS), Helsinki, Finland; <sup>3</sup>Department of Geosciences and Geography, University of Helsinki, Helsinki, Finland; <sup>4</sup>Woodwell Climate Research Center, Falmouth, MA, USA; <sup>5</sup>Marine Research Centre, Finnish Environment Institute (SYKE), Helsinki, Finland; <sup>6</sup>Department of Bioinformatics, Genoscope, Paris, France; <sup>7</sup>Department of Biological and Environmental Science, University of Jyväskylä, Jyväskylä, Finland; <sup>8</sup>Department of Environmental and Biological Sciences, University of Eastern Finland, Kuopio, Finland; <sup>9</sup>Natural Resources Institute Finland (Luke), Helsinki, Finland. \*Corresponding author: [jenni.hultman@helsinki.fi](mailto:jenni.hultman@helsinki.fi)

## Abstract

**Background:** In contrast to earlier assumptions, there is now mounting evidence for the role of tundra soils as important sources of the greenhouse gas nitrous oxide (N<sub>2</sub>O). However, the microorganisms involved in the cycling of N<sub>2</sub>O in this system remain largely uncharacterized. Since tundra soils are variable sources and sinks of N<sub>2</sub>O, we aimed at investigating differences in community structure across different soil ecosystems in the tundra. **Results:** We analysed 1.4 Tb of metagenomic data from soils in northern Finland covering a range of ecosystems from dry upland soils to water-logged fens and obtained 796 manually binned and curated metagenome-assembled genomes (MAGs). We then searched for MAGs harbouring genes involved in denitrification, an important process driving N<sub>2</sub>O emissions. Communities of potential denitrifiers were dominated by microorganisms with truncated denitrification pathways (i.e., lacking one or more denitrification genes) and differed across soil ecosystems. Upland soils showed a strong N<sub>2</sub>O sink potential and were dominated by members of the Alphaproteobacteria such as *Bradyrhizobium* and *Reyranella*. Fens, which had in general net-zero N<sub>2</sub>O fluxes, had a high abundance of poorly characterized taxa affiliated with the Chloroflexota lineage Ellin6529 and the Acidobacteriota subdivision Gp23. **Conclusions:** By coupling an in-depth characterization of microbial communities with *in situ* measurements of N<sub>2</sub>O fluxes, our results suggest that the observed spatial patterns of N<sub>2</sub>O fluxes in the tundra are related to differences in the composition of denitrifier communities.

**Keywords:** Arctic; denitrification; genome-resolved metagenomics; nitrous oxide

## 33 Background

34 Nitrous oxide (N<sub>2</sub>O) is a greenhouse gas (GHG) that has approximately 300 times the global  
35 warming potential of carbon dioxide on a 100-year scale [1]. Atmospheric N<sub>2</sub>O concentrations  
36 have increased by nearly 20% since pre-industrial times, with soils – both natural and  
37 anthropogenic – accounting for up to 70% of the global emissions [2]. Despite being nitrogen (N)  
38 limited and enduring low temperatures throughout most of the year, tundra soils are  
39 increasingly recognized as important sources of N<sub>2</sub>O [3–7]. The relative contribution of tundra  
40 soils to global GHG emissions is predicted to increase in the future [8, 9], as the warming rate  
41 at high latitude environments is more than twice as high than in other regions [10].

42 Microbial denitrification is an important source of N<sub>2</sub>O [11]. Denitrification is a series of  
43 enzymatic steps in which nitrate (NO<sub>3</sub><sup>-</sup>) is sequentially reduced to nitrite (NO<sub>2</sub><sup>-</sup>), nitric oxide  
44 (NO), N<sub>2</sub>O, and dinitrogen (N<sub>2</sub>) via the activity of the Nar, Nir, Nor, and Nos enzymes,  
45 respectively. The denitrification trait is common across a wide range of archaea, bacteria, and  
46 some fungi, most of which are facultative anaerobes that switch to N oxides as electron acceptor  
47 when oxygen becomes limiting [12]. Denitrification is a modular community process performed  
48 in synergy by different microbial taxa that execute only a subset of the complete denitrification  
49 pathway [12, 13]. With the growing number of microbial genomes sequenced in recent years, it  
50 has become evident that only a fraction of the microorganisms involved in the denitrification  
51 pathway encode the enzymatic machinery needed for complete denitrification [14, 15].

52 Compared to high N<sub>2</sub>O-emitting systems such as agricultural and tropical soils, our knowledge  
53 of denitrifier communities in tundra soils is limited. As denitrification leads to the loss of N to  
54 the atmosphere, it enhances the N-limited status of tundra systems thus impacting both  
55 microbial and plant communities [16, 17]. Investigations of denitrifier diversity in the tundra  
56 have been largely limited to gene-centric surveys using microarrays, amplicon sequencing,  
57 qPCR, and read-based metagenomics, which provide limited information on the taxonomic  
58 identity and genomic composition of community members. These studies have shown that  
59 denitrifier communities in the tundra are dominated by members of the phyla Proteobacteria,  
60 Actinobacteria, and Bacteroidetes, and that the potential for complete denitrification is usually  
61 present at the community level [18–22]. However, it is not known whether the complete  
62 denitrification potential occurs within discrete microbial populations or is widespread  
63 throughout populations of truncated denitrifiers lacking one or more denitrification genes. In  
64 addition, tundra soils encompass many different ecosystems, some of which are notorious N<sub>2</sub>O  
65 sources (e.g. bare peat surfaces [3]). N<sub>2</sub>O consumption is usually favoured in wetlands, where  
66 low NO<sub>3</sub><sup>-</sup> availability due to anoxia promotes the reduction of N<sub>2</sub>O to N<sub>2</sub> [23]. In upland soils,

67 N<sub>2</sub>O fluxes vary in both time and space. Strong N<sub>2</sub>O sinks have been observed specially in  
68 sparsely vegetated upland soils [7], but the microbial processes underlying N<sub>2</sub>O consumption in  
69 these systems are largely unknown [24]. Altogether, these large differences in N<sub>2</sub>O fluxes across  
70 tundra ecosystems indicate differences in the structure of microbial communities, but a  
71 comprehensive understanding of the microorganisms driving N<sub>2</sub>O fluxes in tundra soils is  
72 lacking.

73 Modelling N<sub>2</sub>O emissions based on microbial community structure is challenging. N<sub>2</sub>O fluxes  
74 are characterized by a high temporal and spatial heterogeneity driven by several environmental  
75 constraints related to soil pH, N, moisture, and oxygen content [11]. In addition, our knowledge  
76 of the regulation of the denitrification process is largely based on the activity of model organisms  
77 such as the complete denitrifier *Paracoccus denitrificans* [25]. It has been suggested that  
78 incomplete denitrifiers that contain Nir and Nor but lack Nos contribute substantially to soil  
79 N<sub>2</sub>O emissions [26], while non-denitrifying N<sub>2</sub>O reducers, i.e. microorganisms that contain Nos  
80 but lack Nir, can represent an important N<sub>2</sub>O sink [27–29]. Furthermore, the partitioning of  
81 metabolic pathways across different populations with truncated pathways – also known as  
82 metabolic handoffs [30] – has been linked to higher efficiencies in substrate consumption  
83 compared to complete pathways [15, 31]. However, it remains largely unclear how populations  
84 of truncated denitrifiers with different sets of denitrification genes interact with each other and  
85 the environment impacting *in situ* N<sub>2</sub>O emissions.

86 The paucity of in-depth knowledge on denitrifying communities in the tundra impairs our  
87 ability to model current and future N<sub>2</sub>O fluxes from this biome. A better understanding of the  
88 ecological, metabolic, and functional traits of denitrifiers is thus critical for improving current  
89 models and mitigating N<sub>2</sub>O emissions [32]. This invariably relies on the characterization of the  
90 so-called uncultured majority, i.e. microorganisms that have not been cultured to date but which  
91 comprise a high proportion of the microbial diversity in complex ecosystems [33, 34]. Genome-  
92 resolved metagenomics is a powerful tool to access the genomes of uncultured microorganisms  
93 and has provided important insights into carbon cycling processes in tundra soils [35–37].  
94 However, this approach has not yet been applied to investigate the mechanisms driving N<sub>2</sub>O  
95 fluxes in the tundra. Here, we used genome-resolved metagenomics to investigate the diversity  
96 and metabolic capabilities of denitrifiers across different tundra soil ecosystems characterised  
97 by a high variability in net N<sub>2</sub>O fluxes in an area of mountain tundra in Kilpisjärvi, northern  
98 Finland.

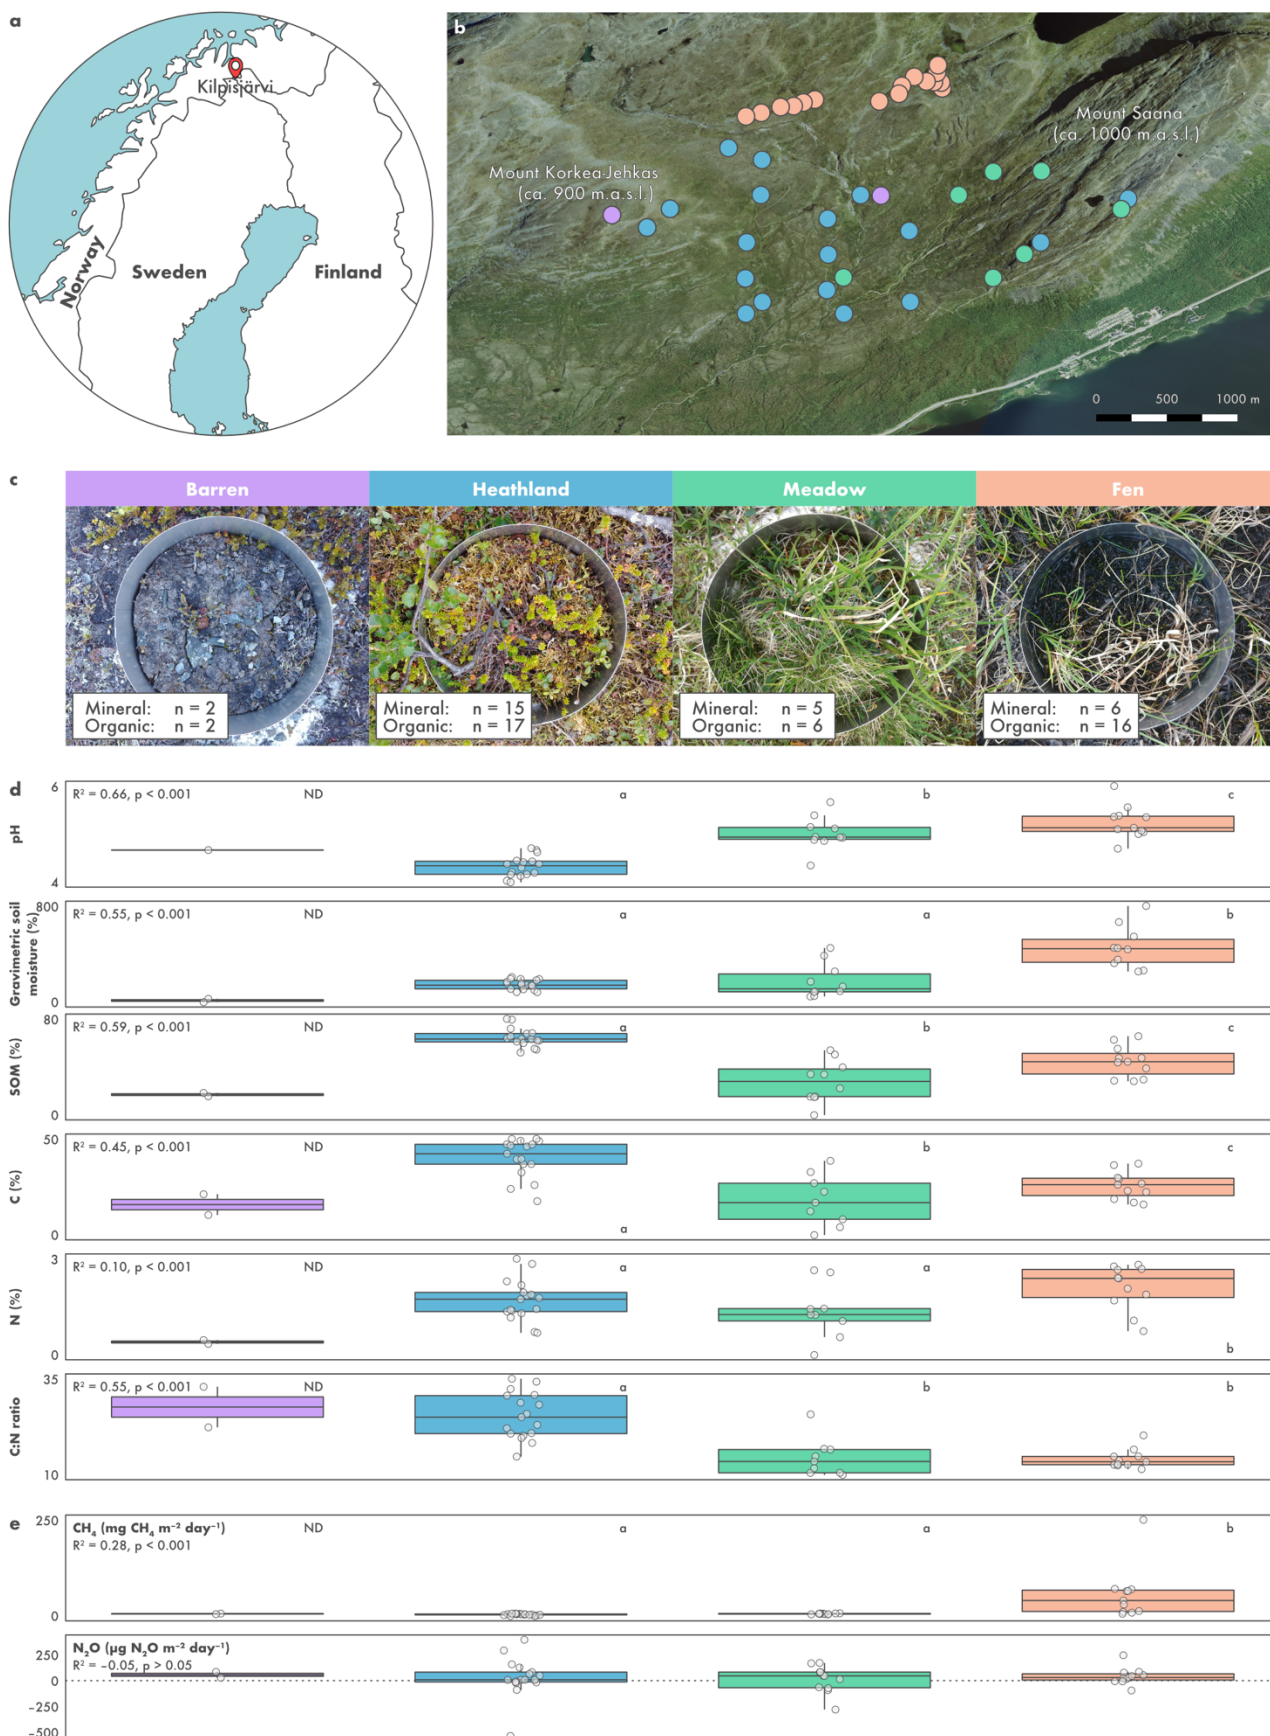

99 **(Previous page) Fig. 1 | Saana Nature Reserve, an area of mountain tundra in**  
100 **Kilpisjärvi, northern Finland. a)** Map of Fennoscandia showing the location of Kilpisjärvi.  
101 **b)** Aerial overview of the study area showing the location of the 43 sites sampled for  
102 metagenomic analysis. Image provided by the National Land Survey of Finland under the  
103 Creative Commons CC BY 4.0 license. **c)** *In situ* photographs of the four types of soil ecosystems  
104 investigated. **d)** Physicochemical characterization of the soil ecosystems based on 41 organic  
105 and 28 mineral samples taken from the 43 sites. **e)** *In situ* ecosystem-level nitrous oxide (N<sub>2</sub>O)  
106 and methane (CH<sub>4</sub>) fluxes measured from the 43 sites using a static, non-steady state, non-flow-  
107 through system. Negative values represent net uptake and positive net emissions. For clarity,  
108 one outlier measurement from a meadow site (660 μg N<sub>2</sub>O m<sup>-2</sup> day<sup>-1</sup>) was removed. In panels d  
109 and e, ecosystems followed by different letters are significantly different (one-way ANOVA,  
110  $p < 0.05$ ). Samples from barren soils were not included in the ANOVA procedure due to the  
111 limited number of samples (ND: not determined).

## 112 **Methods**

### 113 **Study area and sampling**

114 The Saana Nature Reserve (69.04°N, 20.79°E) is located in Kilpisjärvi, northern Finland (**Fig.**  
115 **1a**). The area is part of the mountain tundra biome and is characterized by a mean annual  
116 temperature of -1.9°C and annual precipitation of 487 mm [38]. Our study sites are distributed  
117 across Mount Saana and Mount Korkea-Jehkas and the valley in between (**Fig. 1b**), and include  
118 barren soils, heathlands (dominated by evergreen and deciduous shrubs), meadows (dominated  
119 by graminoids and forbs), and fens (**Fig. 1c**). Sampling was performed across 43 sites (barren  
120 soils,  $n = 2$ ; heathlands,  $n = 18$ ; meadows,  $n = 7$ ; fens,  $n = 16$ ) during the peak of the growing  
121 season in the northern hemisphere. Fen sites were sampled in July 2018 and all other sites in  
122 July 2017. Samples were obtained with a soil corer sterilized with 70% ethanol and, when  
123 possible, cores were split into organic and mineral samples using a sterilized spatula. In total,  
124 69 samples (41 organic and 28 mineral) were obtained from the 43 sites (**Figure 1c, Suppl.**  
125 **Table S1**). Samples were transferred to a whirl-pack bag and immediately frozen in dry ice.  
126 Samples were transported frozen to the laboratory at the University of Helsinki and kept at  
127 -80°C until analyses.

### 128 **Soil physicochemical characterization and *in situ* measurement of GHG fluxes**

129 Soil pH, moisture, and soil organic matter (SOM) content were measured from the 69 samples  
130 according to Finnish (SFS) and international (ISO) standards (SFS 300, ISO 10390, and SFS

131 3008). Carbon (C) and N content were measured using a Vario Micro Cube machine (Elementar,  
132 Langenselbold, Germany). *In situ* ecosystem-level N<sub>2</sub>O and methane (CH<sub>4</sub>) fluxes were  
133 measured from the 43 sites using a static, non-steady state, non-flow-through system composed  
134 of a darkened acrylic chamber (20 cm diameter, 25 cm height) [4, 39]. Measurements were  
135 conducted between 2<sup>nd</sup> July and 2<sup>nd</sup> August 2018, between 10 am and 5 pm. Simultaneous  
136 measurement of GHG fluxes and sampling for metagenomic sequencing was not possible due to  
137 limited resources and logistic constraints. At each site, five 25 mL gas samples were taken  
138 during a 50-minute chamber closure and transferred to evacuated Exetainer vials (Labco,  
139 Lampeter, UK). Gas samples were analysed using an Agilent 7890B gas chromatograph (Agilent  
140 Technologies, Santa Clara, CA, USA) equipped with an autosampler (Gilson, Middleton, WI,  
141 USA) and a flame ionization detector for CH<sub>4</sub> and an electron capture detector for N<sub>2</sub>O. Gas  
142 concentrations were calculated from the gas chromatograph peak areas based on standard  
143 curves with a CH<sub>4</sub> concentration of 0–100 ppm and a N<sub>2</sub>O concentration of 0–5000 ppb.  
144 Differences in physicochemical composition and rates of GHG fluxes across soil ecosystems were  
145 assessed using one-way analysis of variance (ANOVA) followed by Tukey’s HSD test with the  
146 *lm* and *TukeyHSD* functions in R v3.6.3 (<https://www.r-project.org>). Due to the limited number  
147 of samples from barren sites, these were not included in the ANOVA procedure.

## 148 **Metagenome sequencing and processing of raw data**

149 Total DNA and RNA were co-extracted as previously described [40]. Briefly, extraction was  
150 performed on 0.5 g of soil using a hexadecyltrimethyl ammonium bromide (CTAB), phenol-  
151 chloroform, and bead-beating protocol. DNA was purified using the AllPrep DNA Mini Kit  
152 (QIAGEN, Hilden, Germany) and quantified using the Qubit dsDNA BR Assay Kit  
153 (ThermoFisher Scientific, Waltham, MA, USA). Library preparation for Illumina metagenome  
154 sequencing was performed using the Nextera XT DNA Library Preparation Kit (Illumina, San  
155 Diego, CA, USA). Metagenomes were obtained for 69 samples across two paired-end NextSeq  
156 (132–170 bp) and one NovaSeq (2 x 151 bp) runs (**Suppl. Table S1**). Two samples were  
157 additionally sequenced with Nanopore MinION. For this, libraries were prepared using the  
158 SQK-LSK109 Ligation Sequencing Kit with the long fragment buffer (Oxford Nanopore  
159 Technologies, Oxford, UK) and the NEBNext Companion Module for Oxford Nanopore  
160 Technologies Ligation Sequencing Kit (New England Biolabs). Each sample was sequenced for  
161 48 hours on one R9.4 flow cell.

162 We obtained more than 9 billion Illumina (1.4 Tb) and 7 million Nanopore (21.5 Gb) reads from  
163 the 69 soil metagenomes (mean: 19.9 Gb, minimum: 0.7 Gb, maximum: 82.9 Gb) (**Suppl. Table**  
164 **S1**). The quality of the raw Illumina data was verified with fastQC v0.11.9

165 (<https://www.bioinformatics.babraham.ac.uk/projects/fastqc>) and multiQC v1.8 [41]. Cutadapt  
166 v1.16 [42] was then used to trim sequencing adapters and low-quality base calls ( $q < 20$ ) and to  
167 filter out short reads ( $< 50$  bp). Nanopore data were basecalled with GPU guppy v4.0.11 using  
168 the high-accuracy model and applying a minimum quality score of 7. The quality of the  
169 basecalled Nanopore data was assessed with pycoQC v2.5.0.21 [43] and adapters were trimmed  
170 with Porechop v0.2.4 (<https://github.com/rrwick/Porechop>).

## 171 **Taxonomic profiling**

172 Taxonomic profiles of the microbial communities were obtained using a read-based approach,  
173 i.e., based on unassembled Illumina data. Due to differences in sequencing depth across the  
174 samples, the dataset was resampled to 2,000,000 reads per sample with seqtk v1.3  
175 (<https://github.com/lh3/seqtk>). Reads matching the SSU rRNA gene were identified with  
176 METAXA v2.2 [44] and classified against the SILVA database release 138.1 [45] in mothur  
177 v1.44.3 [46] using the Wang's Naïve Bayesian Classifier [47] and a 80% confidence cut-off.  
178 Differences in community structure were assessed using non-metric multidimensional scaling  
179 (NMDS) and permutational ANOVA (PERMANOVA) with the package vegan v2.5.6  
180 (<https://cran.r-project.org/web/packages/vegan>) in R v3.6.3 (functions *metaMDS* and *adonis*,  
181 respectively). Relationships between the abundance of individual genera and N<sub>2</sub>O flux rates  
182 were assessed using linear regression in R v3.6.3 (<https://www.r-project.org>).

## 183 **Metagenome assembling and binning**

184 Metagenome assembling of the Illumina data was performed as two co-assemblies. One co-  
185 assembly comprised the upland soils (barren, heathland, and meadow;  $n = 47$ ) and the other the  
186 fen samples ( $n = 22$ ). For each co-assembly, reads from the respective samples were pooled and  
187 assembled with MEGAHIT v1.1.1.2 [48]. Assembling of the Nanopore data was done for each  
188 sample individually with metaFlye v2.7.1 [49], and contigs were corrected based on Illumina  
189 data from the respective sample with bowtie v2.3.5 [50], SAMtools v1.9 [51], and pilon v1.23  
190 [52]. Quality assessment of the (co-)assemblies was obtained with metaQUAST v5.0.2 [53].

191 MAG binning was done separately for each Illumina and Nanopore (co-)assembly with anvi'o  
192 v6.2 [54] after discarding contigs shorter than 2500 bp. The two Illumina co-assemblies and the  
193 two individual Nanopore assemblies yielded more than 4 million contigs longer than 2,500 bp,  
194 with a total assembly size of 21.1 Gb. Gene calls were predicted with prodigal v2.6.3 [55]. Single-  
195 copy genes were identified with HMMER v.3.2.1 [56] and classified with DIAMOND v0.9.14 [57]  
196 against the Genome Taxonomy Database (GTDB) release 04-RS89 [58, 59]. Illumina reads were  
197 mapped to the contigs with bowtie v2.3.5 [50] and SAM files were sorted and indexed using

198 SAMtools v1.9 [51]. The co-assemblies covered a significant fraction of the original metagenomic  
199 data, with an average read recruitment rate of 54.6% across samples (minimum: 22.9%,  
200 maximum: 75.8%). Due to their large sizes, Illumina co-assemblies were split into 100 smaller  
201 clusters based on differential coverage and tetranucleotide frequency with CONCOCT v1.0.0  
202 [60]. Contigs were then manually sorted into bins based on the same composition and coverage  
203 metrics using the *anvi-interactive* interface in *anvi'o* v6.2 [54]. Nanopore contigs were binned  
204 directly without pre-clustering. Bins that were  $\geq 50\%$  complete according to the presence of  
205 single-copy genes were further refined using the *anvi-refine* interface in *anvi'o* v6.2 [54]. In  
206 addition to taxonomic signal (based on single-copy genes classified against GTDB), either  
207 differential coverage or tetranucleotide frequency was used to identify and remove outlying  
208 contigs. The former was used for bins with a large variation in contig coverage across samples,  
209 and the latter for those with marked differences in GC content across contigs. Medium- and  
210 high-quality bins ( $\geq 50\%$  complete and  $< 10\%$  redundant according to the MIMAG standard [61])  
211 were renamed as MAGs and kept for downstream analyses.

## 212 **Gene-centric analyses**

213 Functional profiles of the microbial communities were obtained using a gene-centric approach  
214 based on assembled data. For each (co-)assembly, gene calls were translated to amino acid  
215 sequences and searched against the KOfam hidden Markov model (HMM) database with  
216 KofamScan v1.3.0 [62]. Only matches with scores above the pre-computed family-specific  
217 thresholds were kept. Genes putatively identified as denitrification genes (*nirK*, *nirS*, *norB*, and  
218 *nosZ*) were submitted to further analyses to identify false positives consisting of distant  
219 homologues that are not involved in denitrification. Amino acid sequences were aligned with  
220 MAFFT v7.429 [63] and alignments were visualized with Unipro UGENE v38.1 [64]. Sequences  
221 were then inspected for the presence of conserved residues at positions associated with the  
222 binding of co-factors and active sites: *nirK*, Cu-binding and active sites [65]; *nirS*, c-heme and  
223 d<sub>1</sub>-heme binding sites [66]; *norB*, binding of the catalytic centres cyt b, b<sub>3</sub>, and Fe<sub>b</sub> [67]; *nosZ*:  
224 binding of the Cu<sub>Z</sub> and Cu<sub>A</sub> centres [67]. Sequences which did not contain the correct amino acid  
225 at these positions were removed. Finally, resulting amino acid sequences were aligned with  
226 MAFFT v7.429 [63] along with reference sequences from the genome of cultured denitrifiers  
227 [14] and a maximum-likelihood tree was computed with FastTree v2.1.11 [68] using the  
228 LG+GAMMA model. Annotation of denitrification genes was also performed for previously  
229 published genomes retrieved from GenBank. These included a set of 1529 MAGs obtained from  
230 soils in Stordalen Mire, northern Sweden [37], and all (n = 69) genomes of Acidobacteriota  
231 strains and candidate taxa (accessed on 9 October 2020).



232 The abundance of functional genes was computed based on read coverage with CoverM v0.6.1  
233 [69]. For this, Illumina reads were mapped to the contigs with minimap v2.17 [70] and coverage  
234 was normalized to reads per kilobase million (RPKM). Differences in functional community  
235 structure were assessed using NMDS and PERMANOVA as described above for the taxonomic  
236 profiles. Differences in the abundance of individual genes across soil ecosystems were assessed  
237 using ANOVA followed by Tukey's HSD test with the *lm* and *TukeyHSD* functions in R v3.6.3  
238 (<https://www.r-project.org>). Due to the limited number of samples from barren sites, these were  
239 not included in the ANOVA procedure. Relationships between the abundance of denitrification  
240 genes and N<sub>2</sub>O flux rates were assessed using linear regression in R v3.6.3.

### 241 **Phylogenomic analyses of MAGs and metabolic reconstruction**

242 Phylogenetic placement of MAGs was done based on 122 archaeal and 120 bacterial single-copy  
243 genes with GTDB-Tk v1.3.0 [71] and the GTDB release 05-RS95 [58, 59]. Acidobacteriota MAGs  
244 containing denitrification genes were submitted to further phylogenomic analyses alongside all  
245 genomes of Acidobacteriota strains and candidate taxa available on GenBank (n = 69; accessed  
246 on 9 October 2020). For this, the amino acid sequence of 23 ribosomal proteins was retrieved for  
247 each genome with *anvi'o* v6.2 [54] and aligned with MUSCLE v3.8.1551 [72]. A maximum  
248 likelihood tree was then computed based on the concatenated alignments with FastTree v2.1.11  
249 using the LG+GAMMA model [68]. *Escherichia coli* ATCC 11775 was used to root the tree.

250 For metabolic reconstruction, MAGs were annotated against the KOfam HMM database [62]  
251 with HMMER v.3.2.1 [56] using the pre-computed score thresholds of each HMM profile. The  
252 *anvi-estimate-metabolism* program in *anvi'o* v6.2 [54] was then used to predict the metabolic  
253 capabilities of the MAGs. A metabolic pathway was considered present in MAGs containing at  
254 least 75% of the genes involved in the pathway. Carbohydrate-active enzymes (CAZymes) were  
255 annotated with dbCAN v.2.0 based on the dbCAN v7 HMM database [73]. Only hits with an  
256 e-value < 1 x 10<sup>-14</sup> and coverage > 0.35 were considered.

### 257 **MAG dereplication and read recruitment analysis**

258 Prior to read recruitment analyses, Illumina and Nanopore MAGs were dereplicated based on  
259 a 99% average nucleotide identity (ANI) threshold with fastANI v1.3 [74] to remove redundancy  
260 (i.e., MAGs that were recovered multiple times across the different assemblies). Read  
261 recruitment analyses were then performed with CoverM v0.6.1  
262 (<https://github.com/wwood/CoverM>). For this, Illumina reads were mapped to the set of non-  
263 redundant MAGs with minimap v2.17 [70] and relative abundances were calculated as a  
264 proportion of the reads mapping to each MAG.

## 265 Results

### 266 Environmental characterization and *in situ* GHG fluxes

267 Our sampling design in Kilpisjärvi included two soil depths across four ecosystems that are  
268 characteristic of the tundra biome (barren soils, heathlands, meadows, and fens) (**Fig. 1a–c**).  
269 In previous studies, we have established in the area a systematic fine-scale sampling of  
270 microclimate, soil conditions, and vegetation in topographically distinct environments [40, 75,  
271 76]. Local variation in topography and soil properties creates a mosaic of habitats characterized  
272 by contrasting ecological conditions. This makes the study setting ideal to investigate species-  
273 environment relationships and ecosystem functioning in the tundra [40, 77, 78]. Soil ecosystems  
274 differed in vegetation cover and physicochemical composition, with fens being characterized by  
275 higher pH, moisture, and N content (one-way ANOVA,  $R^2 = 0.10\text{--}0.66$ ,  $p < 0.001$ ) and, together  
276 with the meadows, lower C:N ratio (one-way ANOVA,  $R^2 = 0.55$ ,  $p < 0.001$ ) (**Fig. 1d**).

277 *In situ* measurements showed a high sink-source variability in net N<sub>2</sub>O fluxes across the  
278 ecosystems (**Fig. 1e**). Although the average N<sub>2</sub>O flux across all sites was small (net consumption  
279 of 6  $\mu\text{g N}_2\text{O m}^{-2}\text{ day}^{-1}$ ), high N<sub>2</sub>O emission at rates of up to 660  $\mu\text{g N}_2\text{O m}^{-2}\text{ day}^{-1}$  was observed  
280 at the meadow sites. Likewise, strong N<sub>2</sub>O consumption (up to  $-435\ \mu\text{g N}_2\text{O m}^{-2}\text{ day}^{-1}$ ) was  
281 observed particularly at the heathland and meadow sites. Net CH<sub>4</sub> emissions were observed  
282 exclusively at the fen sites (**Fig. 1e**).

### 283 Differences in microbial community structure across soils ecosystems

284 Read-based analyses of unassembled SSU rRNA gene sequences showed that microbial  
285 community composition differed across the ecosystems, with fen soils harbouring contrasting  
286 microbial communities compared to the other ecosystems (PERMANOVA,  $R^2 = 0.35$ ,  $p < 0.001$ )  
287 (**Suppl. Fig. S1a**). No differences in community structure were observed between soil depths  
288 or the interaction between soil ecosystem and depth (PERMANOVA,  $p > 0.05$ ). Among  
289 previously described (i.e., not unclassified) taxa, microbial communities in barren, heathland,  
290 and meadow soils were dominated by aerobic and facultative anaerobic heterotrophs such as  
291 *Acidipila/Silvibacterium*, *Bryobacter*, *Granulicella*, *Acidothermus*, *Conexibacter*,  
292 *Mycobacterium*, *Mucilaginibacter*, *Bradyrhizobium*, and *Roseiarcus* (**Suppl. Fig. S1b**). On the  
293 other hand, fen soils were dominated by methanogenic archaea from the genera  
294 *Methanobacterium* and *Methanosaeta* and anaerobic bacteria such as *Thermoanaerobaculum*,  
295 *Desulfobacca*, and *Smithella*, but also the putative aerobic heterotroph *Candidatus Koribacter*.  
296 We did not observe a significant relationship between the abundance of individual microbial  
297 genera and N<sub>2</sub>O flux rates (linear regression,  $p > 0.05$ ).

298 Communities from different ecosystems also differed in their functional potential (**Suppl. Fig.**  
299 **S1c**). Denitrification genes (*nirK*, *nirS*, *norB*, and *nosZ*) were in general more abundant in the  
300 meadows and fens (one-way ANOVA,  $R^2 = 0.48\text{--}0.76$ ,  $p < 0.001$ ) (**Suppl. Fig. S1d**). Fen soils,  
301 which had the highest gravimetric soil water content, also had a higher abundance of genes  
302 involved in sulfate reduction (*dsrA* and *dsrB*) and methanogenesis (*mcrA* and *mcrB*) (one-way  
303 ANOVA,  $R^2 = 0.59\text{--}0.90$ ,  $p < 0.001$ ), indicating the prevalence of anoxic and reductive soil  
304 conditions in these wet sites. We did not observe a significant relationship between  $\text{N}_2\text{O}$  flux  
305 rates and neither the abundance of individual denitrification genes nor the ratio between *nosZ*  
306 and *nirK+nirS* abundances (linear regression,  $p > 0.05$ ). However, the ratio between *nosZ* and  
307 *nirK+nirS* abundances was higher in the meadows (one-way ANOVA,  $R^2 = 0.29$ ,  $p < 0.001$ )  
308 (**Suppl. Fig. S1d**), which indicates a higher potential for  $\text{N}_2\text{O}$  consumption in this ecosystem.

### 309 **A manually curated genomic database from tundra soil metagenomes**

310 Using anvio [54], we obtained 8,043 genomic bins and manually curated these to a set of 796  
311 medium- and high-quality MAGs ( $\geq 50\%$  complete and  $\leq 10\%$  redundant according to the  
312 MIMAG standard [61]) (**Suppl. Fig. S2, Suppl. Table S2**). According to estimates based on  
313 domain-specific single-copy genes, the obtained MAGs were on average 65.4% complete  
314 (minimum: 50.0%, maximum: 100.0%) and 2.7% redundant (minimum: 0.0%, maximum: 9.9%)  
315 (**Suppl. Table S2**). Phylogenomic analyses based on 122 archaeal and 120 bacterial single-copy  
316 genes placed the MAGs across 35 bacterial and archaeal phyla according to the GTDB  
317 classification [58, 59]. The most represented phyla were Acidobacteriota ( $n = 172$ ),  
318 Actinobacteriota ( $n = 163$ ), Proteobacteria (Alphaproteobacteria,  $n = 54$ ; Gammaproteobacteria,  
319  $n = 39$ ), Chloroflexota ( $n = 84$ ), and Verrucomicrobiota ( $n = 43$ ) (**Suppl. Fig. S2**). Most MAGs  
320 ( $n = 703$ ) belonged to genera that do not comprise formally described species, including 303  
321 MAGs that were placed outside genus-level lineages currently described in GTDB and thus  
322 likely represent novel genera (**Suppl. Table S2**).

323 To investigate their distribution across the different soil ecosystems, MAGs were dereplicated  
324 based on a 99% ANI threshold, yielding a set of 761 non-redundant MAGs (**Fig. 2**). On average,  
325 15.8% of the reads from each sample were recruited by the set of non-redundant MAGs  
326 (minimum: 7.6%, maximum: 30.5%). In agreement with the read-based assessment, we  
327 observed differences in MAG composition across the soil ecosystems, with only 50 MAGs shared  
328 between the heathland, meadow, and fen soils (**Suppl. Fig. S3a**). Fen soils harboured the  
329 highest number of MAGs, with an average of 155 MAGs per sample (**Suppl. Fig. S3b**).  
330 Although barren and fen soils had similar taxonomic richness according to the read-based  
331 estimates, only a small number of MAGs was detected in the barren soils (average of four MAGs

332 per sample). This is likely a result of limited sampling and sequencing of this ecosystem, which  
333 consisted of four samples and a total of 7.9 Gb of metagenomic data (**Suppl. Table S1**). The  
334 number of MAGs in heathland and meadow soils was similar (average of 47 and 63 MAGs per  
335 sample, respectively) (**Suppl. Fig. S3b**). In general, barren, heathland, and meadow soils were  
336 dominated by the same set of MAGs (**Suppl. Fig. S3c**). These included members of the  
337 Acidobacteriota (*Sulfotelmato bacter* and unclassified genera in the class Acidobacteriae),  
338 Actinobacteriota (*Mycobacterium* and unclassified genera in the family Streptosporangiaceae),  
339 and Proteobacteria (Alphaproteobacteria: *Reyranella*, *Bradyrhizobium*, and unclassified  
340 Xanthobacteraceae; Gammaproteobacteria: unclassified Steroidobacteraceae). On the other  
341 hand, fen soils were dominated by MAGs that were not assigned to formally described genera,  
342 including lineages of Acidobacteriota (family Koribacteraceae), Actinobacteriota (family  
343 Solirubrobacteraceae), Chloroflexota (class Ellin6529), Desulfobacterota (order  
344 Desulfobaccales), and Halobacterota.

### 345 **Microorganisms from tundra soils have truncated denitrification pathways**

346 To gain insights into the microorganisms involved with the cycling of N<sub>2</sub>O in tundra soils, we  
347 traced the curated denitrification genes to the set of recovered MAGs. Denitrification genes were  
348 found in 110 of the 796 MAGs (13.8%) (**Suppl. Table S2**). These were affiliated with the  
349 archaeal phylum Thermoproteota and many bacterial phyla such as Proteobacteria (classes  
350 Gamma- and Alphaproteobacteria), Acidobacteriota, Bacteroidota, Actinobacteriota,  
351 Chloroflexota, and Verrucomicrobiota (**Fig. 3a**). However, only 17 MAGs were assigned to a  
352 validly described genera (**Suppl. Table S2**). These included members of the Acidobacteriota  
353 (*Solibacter*, *Sulfotelmato bacter*, *Terracidiphilus*, and *Gaiella*), Myxococcota  
354 (*Anaeromyxobacter*), Planctomycetota (*Singulisphaera*), Proteobacteria (Alphaproteobacteria:  
355 *Bauldia*, *Bradyrhizobium*, *Methylocella*, and *Reyranella*; Gammaproteobacteria: *Gallionella*  
356 and *Rhizobacter*), and Verrucomicrobiota (*Lacunisphaera* and *Opitutus*). On average, 1.8% of  
357 the reads in each sample were recruited by all denitrifiers combined (minimum: 0.4%,  
358 maximum: 6.1%). In general, denitrifiers were most abundant in the fens (1.0–6.1%) and least  
359 abundant in the heathlands (0.4–2.1%).

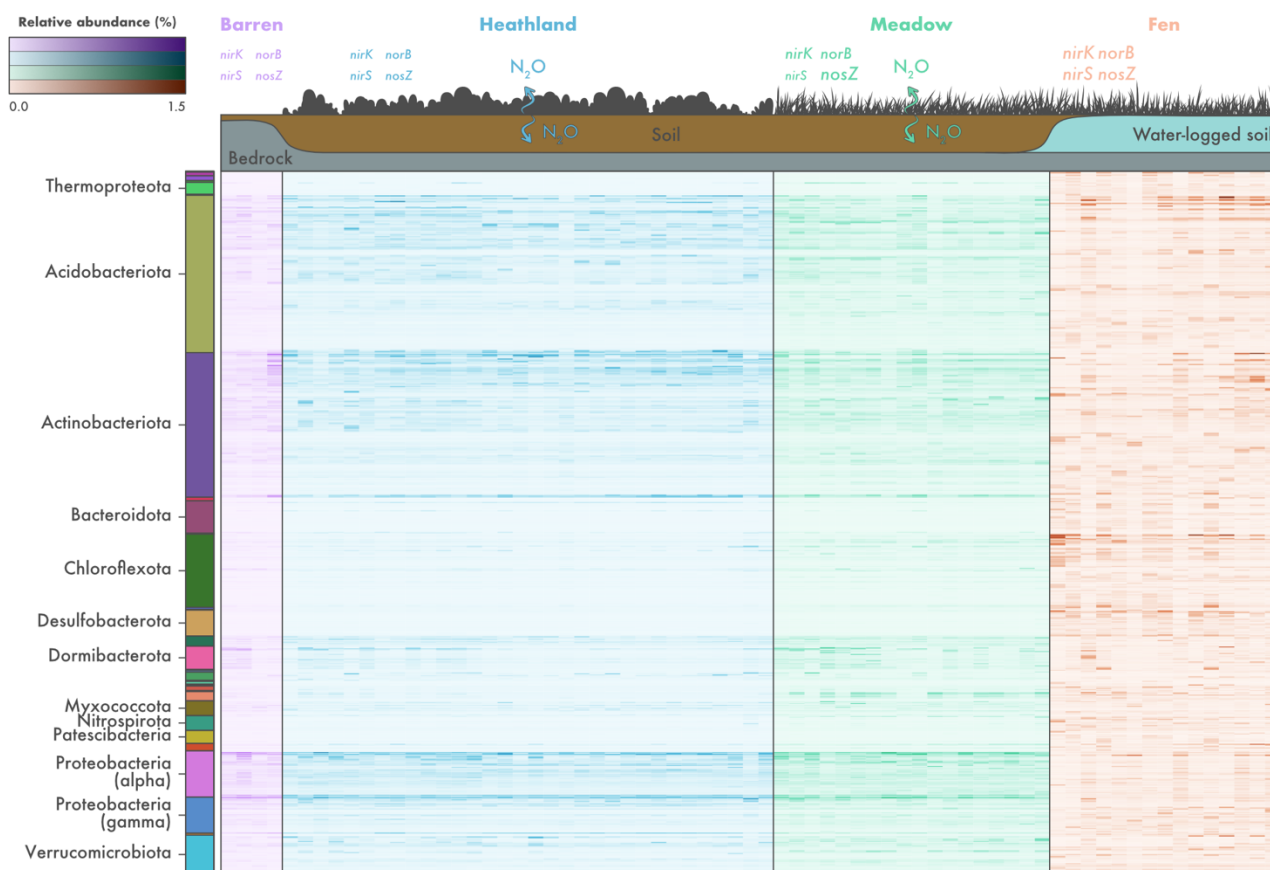

360 **Fig. 2 | Microbial community composition across different soil ecosystems in the**  
 361 **tundra.** Relative abundance of 761 non-redundant metagenome-assembled genomes (MAGs)  
 362 recovered from soils in Kilpisjärvi, northern Finland. Relative abundances were computed as a  
 363 proportion of the reads mapping to each MAG. Phylum-level taxonomic assignments are shown  
 364 for the major groups found. The scheme on the top of the figure represents ecosystem-level  
 365 nitrous oxide (N<sub>2</sub>O) fluxes based on *in situ* measurements (**Fig. 1**) and the abundance of  
 366 denitrification genes based on a gene-centric analysis (**Suppl. Fig. S1**). The font size of  
 367 denitrification genes represents their abundance across the different ecosystems.

368 Genes involved in denitrification were found exclusively in MAGs with truncated denitrification  
 369 pathways, i.e., MAGs missing one or more genes involved in the complete denitrification process  
 370 (**Fig. 3a**). Of the 110 MAGs harbouring denitrification genes, the vast majority (n = 104)  
 371 encoded only one of the Nir, Nor, and Nos enzymes and no MAG encoded all the three enzymes  
 372 required for the reduction of NO<sub>2</sub><sup>-</sup> to N<sub>2</sub>. Unsurprisingly, co-occurrence of genes encoding the  
 373 three enzymes was also not observed in any of the other genomic bins of lower quality that were  
 374 discarded from the final MAG dataset (i.e., bins that were < 50% complete and/or > 10%  
 375 redundant). To verify if microorganisms with truncated denitrification pathways are common  
 376 in other tundra systems, we expanded our analysis to 1529 MAGs recovered from permafrost

377 peatland, bog, and fen soils in Stordalen Mire, northern Sweden [37]. Among these, 225 MAGs  
 378 (14.7%) contained denitrification genes (**Suppl. Fig. S4**). MAGs encompassed a similar  
 379 taxonomic profile as observed in the Kilpisjärvi dataset, and MAGs with truncated  
 380 denitrification pathways were also the norm in Stordalen Mire soils. Only one MAG, assigned  
 381 to the Gammaproteobacteria genus *Janthinobacterium*, encoded all the Nir, Nor, and Nos  
 382 enzymes required for the reduction of NO<sub>2</sub><sup>-</sup> to N<sub>2</sub>.

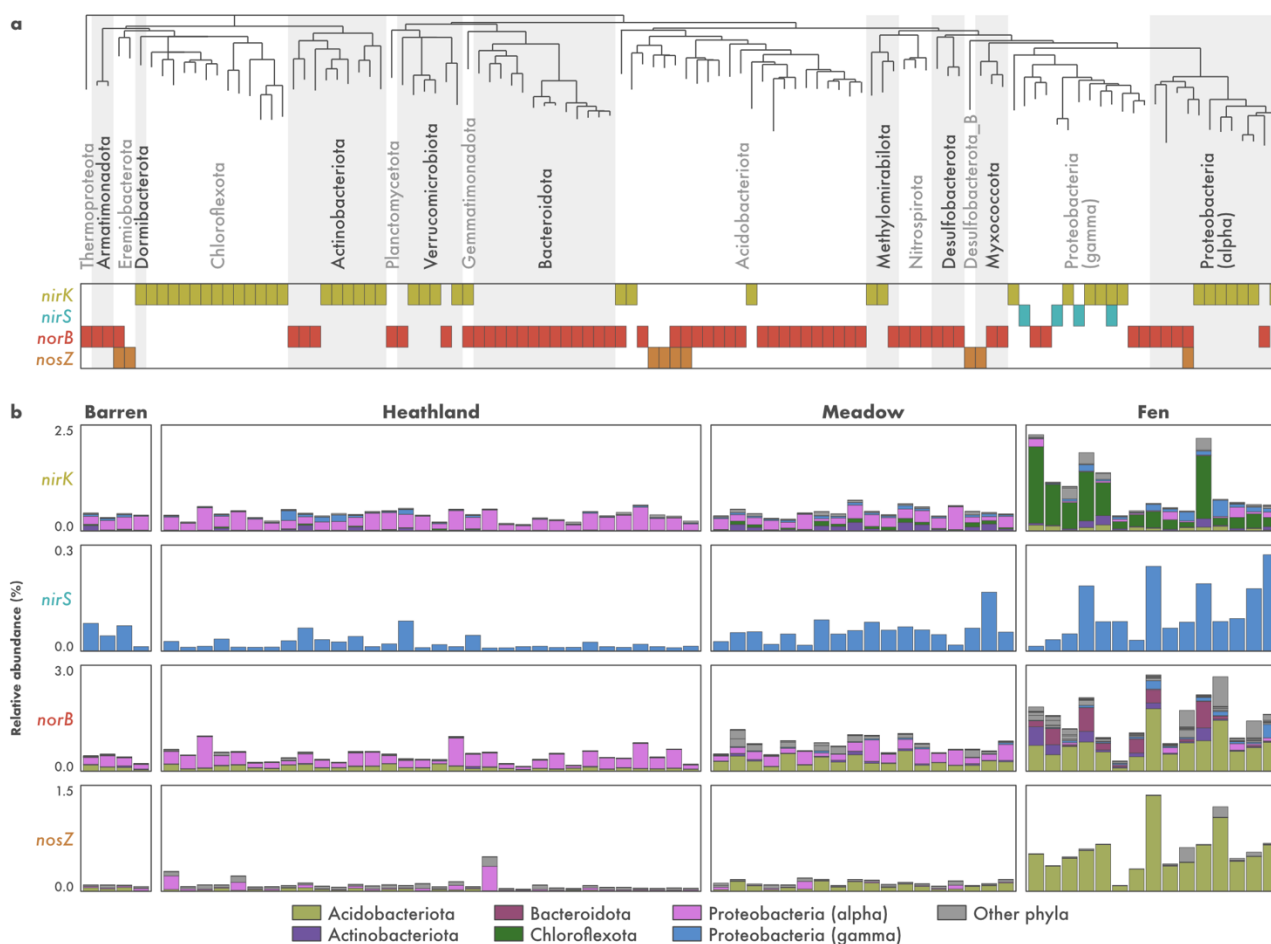

383 **Fig. 3 | Metabolic potential for denitrification in tundra soils. a)** Distribution of  
 384 denitrification genes across 110 metagenome-assembled genomes (MAGs) recovered from  
 385 tundra soils in Kilpisjärvi, northern Finland. Genes encoding the nitrite (*nirK/nirS*), nitric oxide  
 386 (*norB*), and nitrous oxide (*nosZ*) reductases were annotated using a three-step approach  
 387 including (1) identification using hidden Markov models from the KOfam database, (2) manual  
 388 inspection for the presence of conserved residues at positions associated with the binding of co-  
 389 factors and active sites, and (3) phylogenetic analyses along with sequences from archaeal and  
 390 bacterial genomes (**Suppl. Fig. S5**). **b)** Phylum-level relative abundance of microorganisms  
 391 harbouring denitrification genes across the different soil ecosystems, computed as a proportion  
 392 of reads mapping to each MAG.

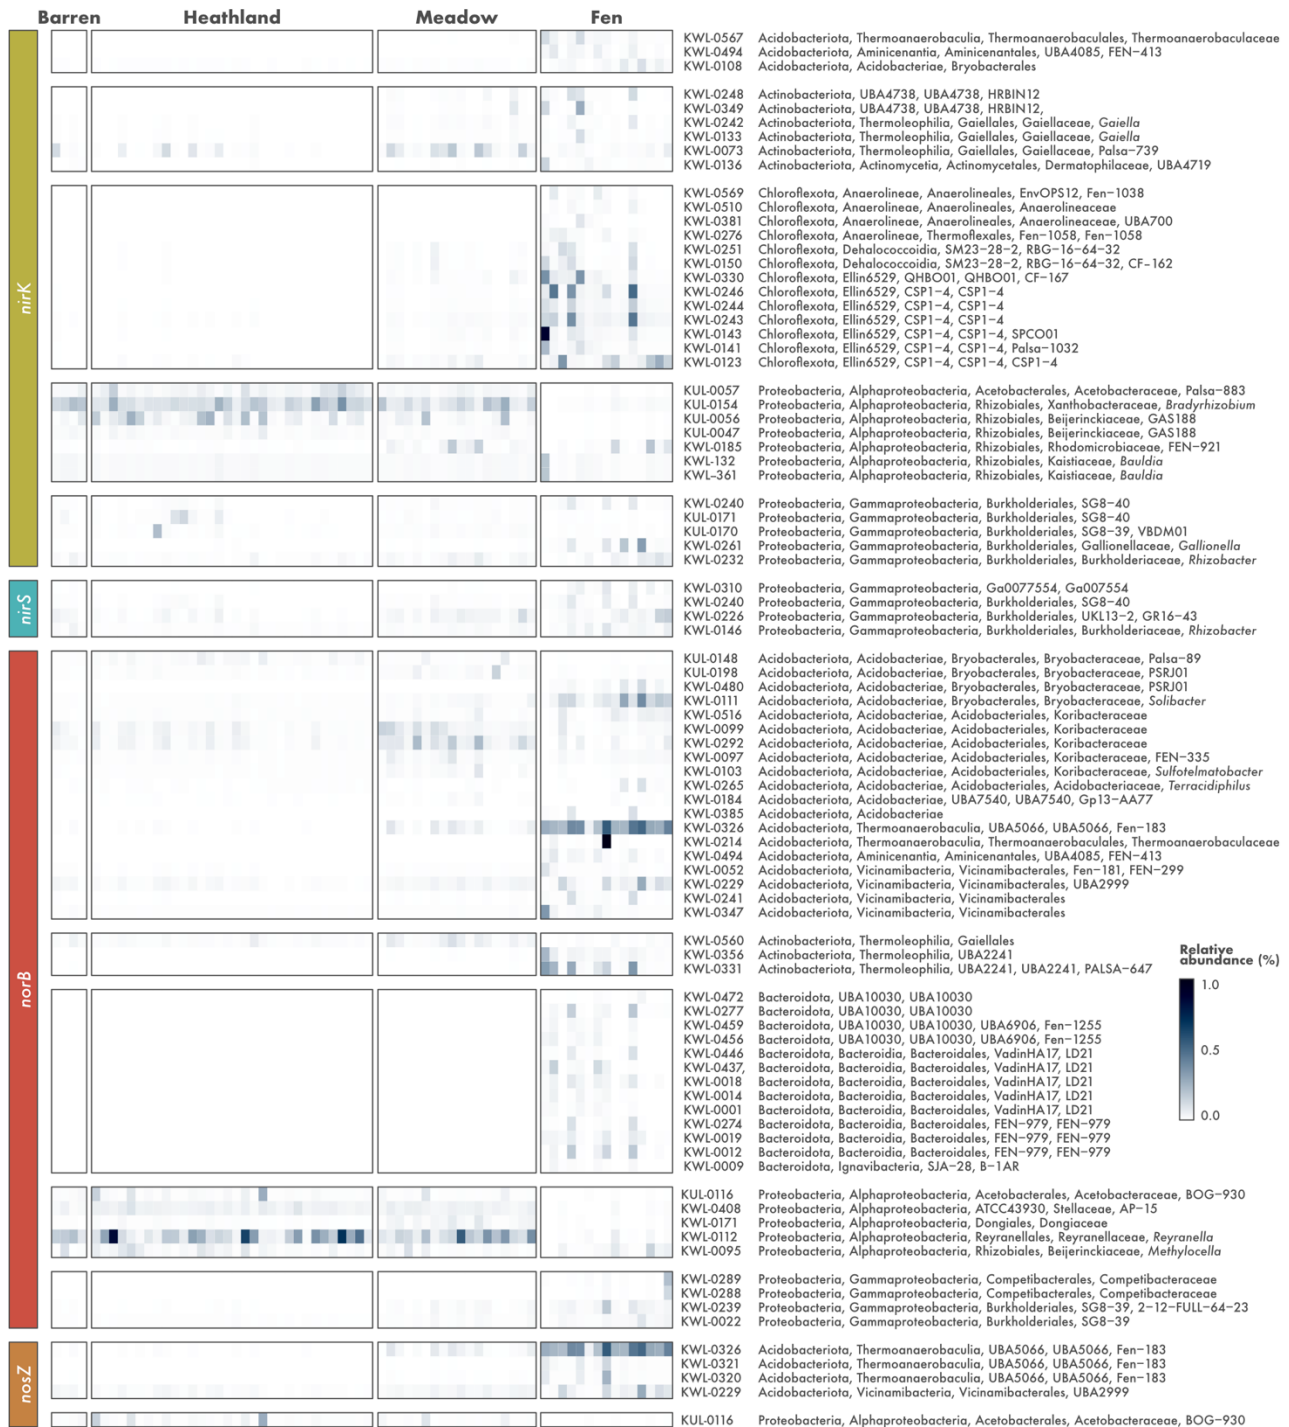

393 **Fig. 4 | Relative abundance of metagenome-assembled genomes (MAGs) harbouring**  
 394 **denitrification genes across different soil ecosystems in the tundra.** MAGs were  
 395 recovered from soils in Kilpisjärvi, northern Finland, and annotated for genes encoding the  
 396 nitrite (*nirK/nirS*), nitric oxide (*norB*), and nitrous oxide (*nosZ*) reductases using a three-step  
 397 approach. Relative abundances were computed as a proportion of reads mapping to each MAG.  
 398 MAG taxonomy is based on the Genome Taxonomy Database (GTDB) release 05-RS95.

399 **Microorganisms affiliated with the Chloroflexota lineage Ellin6529 are the**  
400 **main denitrifiers *stricto sensu* in fen soils**

401 The reduction of NO<sub>2</sub><sup>-</sup> to NO, performed by microorganisms harbouring the *nirK* or *nirS* genes,  
402 is the hallmark step of denitrification and is often referred to as denitrification *stricto sensu* as  
403 it involves the conversion of a soluble substrate to a gaseous product thus leading to the removal  
404 of N from the system [12]. Of the 110 Kilpisjärvi MAGs harbouring genes involved in  
405 denitrification, 46 contained *nirK/nirS* genes and are thus potential denitrifiers *stricto sensu*  
406 **(Fig. 3a)**. These belonged mainly to the bacterial phyla Chloroflexota, Actinobacteriota, and  
407 Proteobacteria (classes Alpha- and Gammaproteobacteria). Most MAGs (n = 43) contained the  
408 *nirK* gene, which encodes the copper-containing form of Nir **(Suppl. Fig. S5a)**. The *nirS* gene  
409 encoding the cytochrome cd<sub>1</sub>-containing form of Nir was present in four Gammaproteobacteria  
410 MAGs **(Suppl. Fig. S5b)**, including one MAG that contained both genes.

411 The composition of potential denitrifier *stricto sensu* communities differed across the ecosystems  
412 **(Fig. 3b)**. MAGs belonging to the Alphaproteobacteria class of the Proteobacteria were the most  
413 abundant in the barren, heathland, and meadow soils, particularly the MAG KUL-0154  
414 assigned to the genera *Bradyrhizobium* **(Fig. 4)**. Two other Alphaproteobacteria MAGs that do  
415 not correspond to formally described genera in the families Acetobacteraceae and  
416 Beijerinckiaceae (KUL-0057 and KUL-0056, respectively) were also found at high abundances.  
417 In addition, one Actinobacteriota MAG assigned to an uncharacterized genus in the family  
418 Gaiellaceae (KWL-0073), was abundant in the meadow soils. On the other hand, fen  
419 communities were dominated by MAGs belonging to the phylum Chloroflexota **(Fig. 3b)**, which  
420 included seven MAGs assigned to the class-level lineage Ellin6529 **(Fig. 4)**.

421 None of the Ellin6529 MAGs that were dominant in the fen communities contained the key  
422 genes involved in autotrophic carbon fixation, dissimilatory sulfate reduction, dissimilatory  
423 nitrate reduction to ammonia, and nitrogen fixation **(Suppl. Table S3)**. Analysis of genes  
424 encoding terminal oxidases involved in the aerobic respiratory electron chain revealed that all  
425 seven Ellin6529 MAGs harboured the *coxABC* genes encoding the *aa3*-type cytochrome c  
426 oxidase. Four MAGs also contained the *cydAB* genes encoding the cytochrome *bd* ubiquinol  
427 oxidase, a terminal oxidase with high affinity for oxygen that also plays a role in preventing the  
428 inactivation of oxygen-sensitive enzymes and protecting against oxidative and nitrosative  
429 stress, toxic compounds such as cyanide, and other stress conditions such as high temperature  
430 and high pH [79, 80]. The dominant MAGs in the barren, heathland, and meadow soils encoded  
431 a different set of aerobic terminal oxidases. In addition to the *cydAB* genes, the MAGs KUL-  
432 0057 and KUL-0154 also contained the *cyoABCD* genes encoding the cytochrome o ubiquinol



433 oxidase, which is the main terminal oxidase under highly aerobic conditions [81], and KUL-0057  
434 also contained genes encoding the *cbb3*-type cytochrome c oxidase, a terminal oxidase with high  
435 affinity for oxygen [82]. Genes involved in the Calvin cycle (e.g., *rbcL*, *rbcS*, and *prkB*) were  
436 found in the *Bradyrhizobium* MAG (KUL-0154), and none of the key genes for autotrophic  
437 carbon fixation pathways were present in the other Alphaproteobacteria MAGs that were  
438 dominant in the barren, heathland, and meadow soils.

### 439 **Acidobacteriota with the potential to reduce NO and N<sub>2</sub>O are abundant in the fens**

440 The stepwise reduction of NO to N<sub>2</sub>O and N<sub>2</sub> carried out by microorganisms containing the *norB*  
441 and *nosZ* genes, respectively, represents the final step of denitrification and the main biotic  
442 control on N<sub>2</sub>O emissions. Soil denitrification rates depend on multiple environmental  
443 conditions such as adequate moisture and inorganic N availability, but whether it results in the  
444 emission of N<sub>2</sub>O or N<sub>2</sub> is ultimately linked to a balance between the activity of NO and N<sub>2</sub>O  
445 reducers [11, 15]. *norB* and *nosZ* genes were identified in 62 and 9 Kilpisjärvi MAGs,  
446 respectively, belonging mostly to the phyla Actinobacteriota, Bacteroidota, Acidobacteriota, and  
447 Proteobacteria (class Alphaproteobacteria) (**Fig. 3a**). Apart from one Gemmatimonadota and  
448 one Acidobacteriota MAG, *norB*- and *nosZ*-containing MAGs were almost exclusively non-  
449 denitrifiers *stricto sensu*, i.e., they did not harbour the *nirK/nirS* genes involved in the reduction  
450 of NO<sub>2</sub><sup>-</sup> to NO. Most MAGs (n = 48) harboured a *norB* gene encoding the monomeric, quinol-  
451 dependent form of Nor (qNor), while the remaining MAGs (n = 8) encoded the cytochrome  
452 c-dependent Nor (cNor) (**Suppl. Fig. S5c**). In regards to the *nosZ* gene, most MAGs (n = 6)  
453 contained sequences affiliated with the clade II (also known as atypical) NosZ [14, 15, 27]  
454 (**Suppl. Fig. S5d**). Only four MAGs contained both the *norB* and *nosZ* genes and thus have the  
455 potential to reduce NO completely to N<sub>2</sub> (**Fig. 3a**).

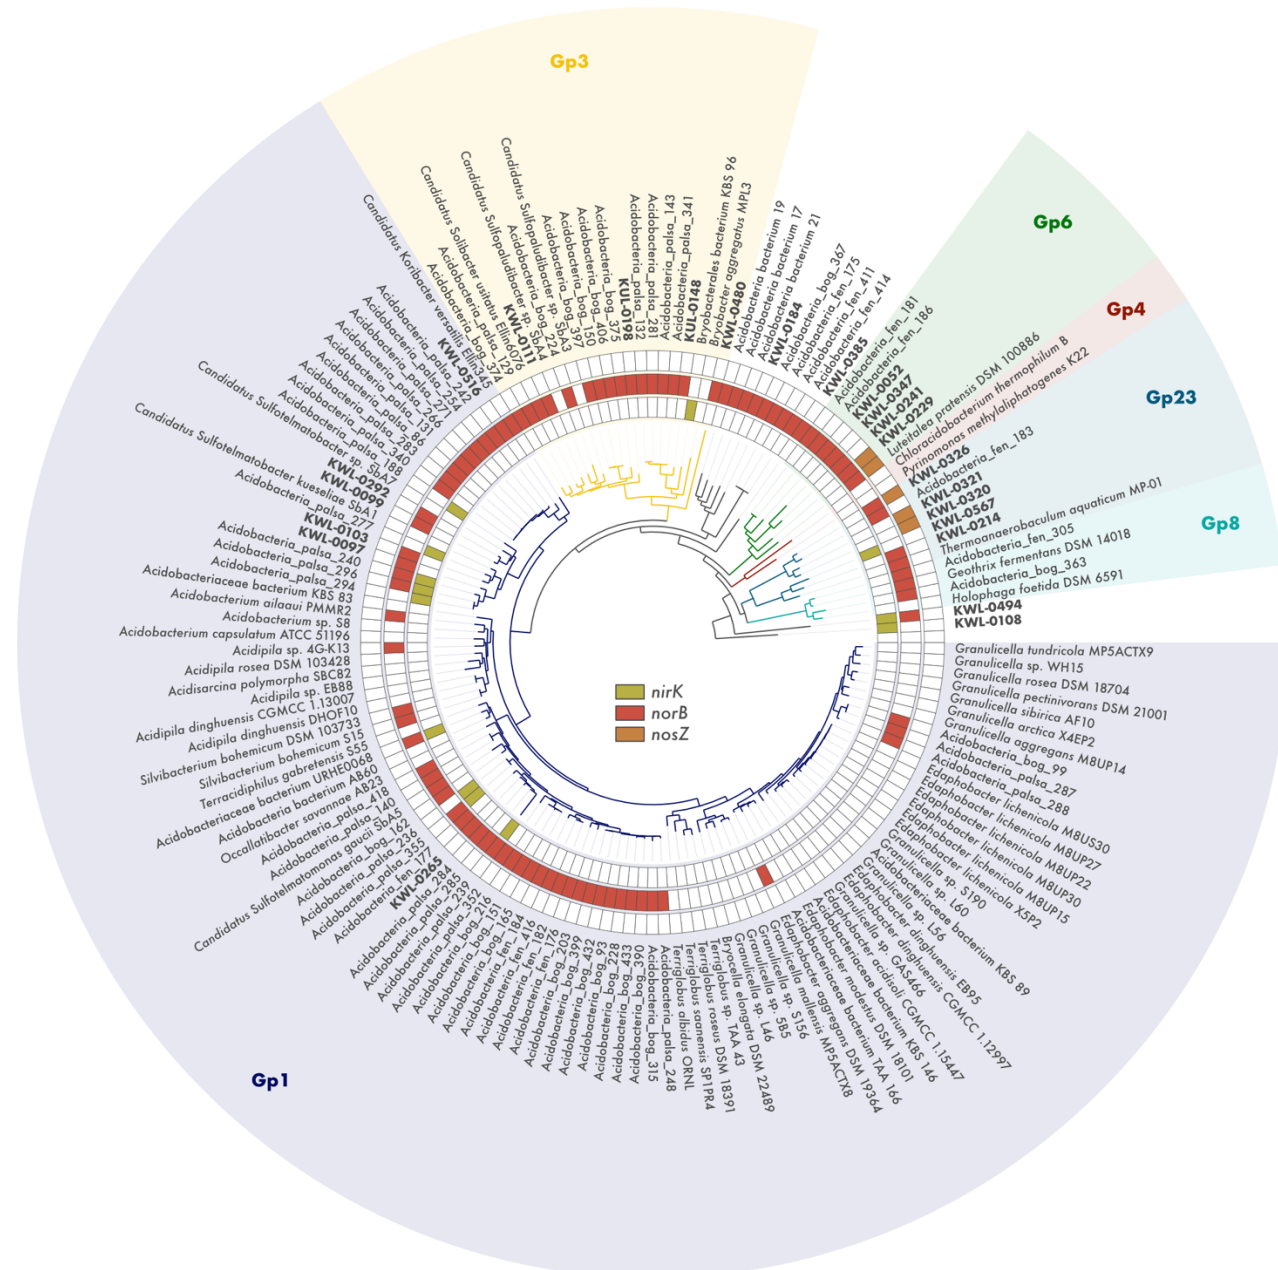

456 **Fig. 5 | Metabolic potential for denitrification among members of the phylum**  
 457 **Acidobacteriota.** Phylogenomic analysis of 85 Acidobacteriota metagenome-assembled  
 458 genomes (MAGs) containing denitrification genes recovered from tundra soils in Kilpisjärvi  
 459 (northern Finland) and Stordalen Mire (northern Sweden), and 69 genomes of Acidobacteriota  
 460 strains and candidate taxa. Maximum likelihood tree based on concatenated alignments of 23  
 461 ribosomal proteins and rooted with *Escherichia coli* ATCC 11775 (not shown). Genes encoding  
 462 the nitrite (*nirK*), nitric oxide (*norB*), and nitrous oxide (*nosZ*) reductases were annotated using  
 463 a three-step approach to avoid false positives (see methods).

464 As observed for the denitrifier *stricto sensu* communities, the communities of potential NO and  
465 N<sub>2</sub>O reducers also differed between the ecosystems (**Fig. 3b**). MAGs assigned to the  
466 Alphaproteobacteria class of the Proteobacteria were the most abundant in the barren,  
467 heathland, and meadow soils. In particular, the MAG KWL-0112 assigned to the genera  
468 *Reyranella* was the dominant *norB*-containing MAG, while KUL-0116 (belonging to an  
469 uncharacterized genus in the family Acetobacteraceae) was the dominant MAG harbouring the  
470 *nosZ* gene (**Fig. 4**). On the other hand, fen communities were dominated by Acidobacteriota  
471 MAGs (**Fig. 3b**), particularly the *norB*- and *nosZ*-containing MAG KWL-0326 affiliated with  
472 the class Thermoanaerobaculia (**Fig. 4**). This MAG contained the same set of genes encoding  
473 aerobic terminal oxidases as found in the *nirK*-containing Ellin6529 MAGs that were dominant  
474 in the fen sites, namely *coxABC* and *cydAB* (**Suppl. Table S3**). No genes involved in carbon  
475 fixation, dissimilatory sulfate reduction, dissimilatory nitrate reduction to ammonia, and  
476 nitrogen fixation were found in any of the dominant *norB*- and *nosZ*-containing MAGs.

477 To elucidate the phylogenetic placement of the Acidobacteriota MAGs and to verify if the  
478 potential for NO and N<sub>2</sub>O reduction is present in other members of this phylum, we analysed  
479 all available genomes of Acidobacteriota strains and candidate taxa available on GenBank. This  
480 revealed that genes encoding the Nir and Nos enzymes are widespread across the phylum  
481 Acidobacteriota (**Fig. 5**). Genes encoding the Nor enzyme were present in all but one of the six  
482 Acidobacteriota subdivisions with genomes from cultured representatives. This included the  
483 strains *Acidobacterium ailaui* PMMR2 (subdivision Gp1), *Acidipila* sp. 4G-K13 (Gp1),  
484 *Silvibacterium bohemicum* DSM 103733 and *S. bohemicum* S15 (Gp1), Acidobacteriaceae  
485 bacterium URHE0068 (Gp1), *Edaphobacter aggregans* DSM 19364 (Gp1), *Luteitalea pratensis*  
486 DSM 100886 (Gp6), *Geothrix fermentans* DSM 14018 (Gp8), and *Thermoanaerobaculum*  
487 *aquaticum* MP-01 (Gp23), as well as the candidate taxa *Candidatus* Koribacter versatilis  
488 Ellin345 (Gp1), *Candidatus* Sulfotelmatomonas gaucii SbA5 (Gp1), and *Candidatus* Solibacter  
489 usitatus Ellin6076 (Gp3). On the other hand, genes encoding the Nos enzyme were found only  
490 in members of the subdivisions Gp6 and Gp23.

## 491 Discussion

492 The 796 MAGs obtained in the present study by a manual binning and curation effort represent  
493 one of the largest genomic catalogues of microorganisms from tundra soils to date. Earlier gene-  
494 centric investigations have revealed the potential for complete denitrification in tundra soils  
495 [22, 83], however, these approaches fail to reveal the wider genomic context of the genes involved  
496 in this pathway. By applying the genome-resolved metagenomics approach, we traced

497 denitrification genes to specific microbial populations, thereby allowing a detailed investigation  
498 of the genomic makeup of potential denitrifiers in tundra soils. This approach also enabled us  
499 to access the genomes of uncultured, poorly characterized taxa, which comprise the majority of  
500 the microorganisms in soils and other complex ecosystems [33, 34].

501 Our genome-resolved survey revealed that denitrification across different tundra soil  
502 ecosystems is dominated by microorganisms with truncated denitrification pathways (i.e.,  
503 harbouring only a subset of the genes required for complete denitrification), most of which  
504 represent poorly characterized taxa without cultured representatives. The congruence of these  
505 findings in both our original dataset of northern Finland soils and a re-analysis of a  
506 comprehensive metagenomic dataset from soils in northern Sweden [37] suggests that  
507 truncated denitrification pathways are not a methodological artifact arising from the metabolic  
508 reconstruction of fragmented genomes. Indeed, recent genome-resolved investigations have  
509 shown that cross-feeding between microorganisms with truncated metabolic pathways, also  
510 known as metabolic handoffs, are the norm across a wide range of ecosystems such as grassland  
511 soil, aquifer sediment, groundwater, and the ocean, and not only in relation to denitrification  
512 but other redox transformations as well [30, 84, 85]. Although it has been established that  
513 denitrification is a community effort performed by different microbial populations [12–15], these  
514 genome-resolved metagenomic studies are beginning to reveal a more in-depth, ecosystem-  
515 centric representation of the denitrification pathway. In addition to their predominance in  
516 genomic databases [14], it appears that truncated denitrifiers are also dominant within defined  
517 ecosystems across various terrestrial and aquatic biomes, including the tundra. It has been  
518 suggested that the partitioning of metabolic pathways across different populations via metabolic  
519 handoffs is advantageous as it eliminates competition between enzymes accelerating substrate  
520 consumption [15, 31] and provides flexibility and resilience to the communities in face of  
521 environmental disturbances [30]. We further hypothesize that the predominance of  
522 denitrification pathways characterized mostly by metabolic handoffs in tundra soils could be  
523 related to N limitation. If metabolic handoffs enable a more effective substrate consumption as  
524 previously suggested [15, 31], truncated denitrification pathways would be favoured in tundra  
525 soils which are mostly N limited but undergo rapid surges in N availability, e.g., during the  
526 spring melting season [86].

527 Tundra ecosystems are typically heterogeneous. Previous studies in the Kilpisjärvi region have  
528 shown that soil properties such as pH and moisture do not have any strong relationship with  
529 the macrotopography of the area (50–500 m scale). Instead, environmental variation is  
530 controlled by the fine-scale mesotopographic variation of the relief (2–20 m scale), resulting in  
531 a mosaic of different soil ecosystems with contrasting vegetation [40, 75–78]. Our results showed

532 that denitrifier communities in the tundra differ between drier upland ecosystems (barren,  
533 heathland, and meadow soils) and water-logged fens. This is likely related to differences in soil  
534 moisture affecting oxygen availability in these ecosystems. The dominant denitrifier  
535 populations in the oxic dry upland soils, related to the genera *Bradyrhizobium*, *Reyranella*, and  
536 other uncharacterized genera in the class Alphaproteobacteria, encoded aerobic terminal  
537 oxidases that are active under highly aerobic conditions as well as oxidases with high oxygen  
538 affinity [81, 82]. The former likely provides an adaptive advantage in these soils by allowing  
539 rapid aerobic growth under standard conditions of high oxygen availability, and the latter would  
540 sustain growth in microoxic niches within the soil matrix and during periods of reduced oxygen  
541 availability (e.g., during the spring melting season).

542 On the other hand, fen soils are continuously inundated because they are located at lower  
543 topographic positions where the water table is permanently at or near the soil surface. The  
544 result is a mostly anoxic environment due to the slow rate at which oxygen diffuses into the  
545 water-logged soil, favouring reduced rather than oxidized soil chemistry. In line with this, we  
546 found a predominance of anaerobic processes in the fens, including a higher abundance of genes  
547 involved in denitrification, sulfate reduction, and methanogenesis, the latter supported by *in*  
548 *situ* measurements showing net CH<sub>4</sub> emission at the fen sites. Communities of potential  
549 denitrifiers in the fen soils were dominated by somewhat enigmatic taxa, namely potential NO<sub>2</sub><sup>-</sup>  
550 reducers affiliated with the class Ellin6529 of the Chloroflexota and NO/N<sub>2</sub>O reducers assigned  
551 to the subdivision Gp23 of the Acidobacteriota. Both groups are major members of microbial  
552 communities in soils worldwide [87], and RNA-based investigations have shown that they are  
553 active in tundra soils during both summer and winter seasons [40, 88]. *Thermoanaerobaculum*  
554 *aquaticum* MP-01, the only cultivated member of the Acidobacteriota subdivision Gp23, is a  
555 strictly anaerobic bacterium that has been shown to use Fe and Mn, but not NO<sub>3</sub><sup>-</sup> nor NO<sub>2</sub><sup>-</sup>, as  
556 electron acceptors in anaerobic respiration [89]. However, studies investigating the use of  
557 nitrogen oxides in anaerobic respiration usually provide soluble NO<sub>3</sub><sup>-</sup> or NO<sub>2</sub><sup>-</sup> as electron  
558 acceptors, not the gases NO and N<sub>2</sub>O, which bias against truncated denitrifiers that do not  
559 contain the *narG* and *nirK/nirS* genes [90]. Ellin6529 – formerly G04 – were first detected by  
560 culture-independent methods in alpine tundra wet meadow soil in the Colorado Rocky  
561 Mountains, USA [91], and later isolated in a study targeting slow-growing and mini-colony  
562 forming bacteria from Australian agricultural soil [92]. However, their ecological, physiological,  
563 and metabolic preferences remain largely unknown. Their genomic composition and high  
564 abundance in the water-logged, anoxic fen soils suggest that the Ellin6529 and Gp23  
565 populations found in this study are likely able to grow anaerobically with the use of NO and  
566 N<sub>2</sub>O as electron acceptors. However, it is known that in addition to their role in anaerobic

567 respiration, NO and N<sub>2</sub>O reduction can be used as a detoxification mechanism or as electron  
568 sink for metabolism. For example, the aerobic *Gemmatimonas aurantica* T-27 is not able to grow  
569 on N<sub>2</sub>O alone, but can use N<sub>2</sub>O as electron acceptor transiently when oxygen is depleted [93].

570 In addition to microbial community structure, differences in N<sub>2</sub>O fluxes observed between  
571 upland and fen soils also appear to be linked to soil moisture. Some of the drier upland sites  
572 investigated were hotspots of N<sub>2</sub>O consumption. This is particularly interesting for the acidic  
573 heathland soils, as low pH is known to impair the expression of the NosZ enzyme thus promoting  
574 N<sub>2</sub>O emission [94, 95]. On the other hand, fens had close to net-zero N<sub>2</sub>O fluxes, which is in line  
575 with previous observations for water-saturated soils both in the tundra [7] and worldwide [11,  
576 13]. This has been linked to lower rates of N mineralization and nitrification in anoxic  
577 ecosystems, which limit the availability of NO<sub>3</sub><sup>-</sup> and NO<sub>2</sub><sup>-</sup> and promote complete denitrification,  
578 resulting in N<sub>2</sub> as end product rather than N<sub>2</sub>O. Indeed, supplementing fen soils in the tundra  
579 with NO<sub>3</sub><sup>-</sup> and NO<sub>2</sub><sup>-</sup> has shown to promote N<sub>2</sub>O emissions [96]. Moreover, climate change models  
580 predict lowering of the water table in high-latitude wetlands, which could lead to increased N<sub>2</sub>O  
581 emissions from these ecosystems which contain substantial amounts of both C and N bound to  
582 the soil organic matter [97, 98].

## 583 **Conclusions**

584 A better understanding of denitrification is paramount for our ability to model N<sub>2</sub>O emissions  
585 and mitigate climate change. High-latitude environments in particular have experienced  
586 amplified warming in recent decades, a trend that is likely to continue in the coming centuries.  
587 As mechanisms of GHG emissions are very climate sensitive, the contribution of tundra soils to  
588 global GHG atmospheric levels is thus predicted to increase in the future leading to a positive  
589 feedback loop. Compared with CO<sub>2</sub> and CH<sub>4</sub>, measurements of N<sub>2</sub>O fluxes in tundra soils are  
590 sparse and are rarely coupled with a characterization of the microorganisms involved, making  
591 the magnitude and drivers of N<sub>2</sub>O fluxes across the polar regions uncertain. While  
592 microorganisms with truncated denitrification pathways appear to dominate the denitrifier  
593 communities investigated here, the potential for complete denitrification was present at the  
594 ecosystem level. In addition to a better monitoring of N<sub>2</sub>O emissions throughout the tundra  
595 biome, our results suggest that a better understanding of the contribution of tundra soil to global  
596 N<sub>2</sub>O levels relies on the elucidation of the regulatory mechanisms of metabolic handoffs in  
597 communities dominated by truncated denitrifiers.

## 598 **Declarations**

### 599 **Ethics approval and consent to participate**

600 Not applicable.

### 601 **Consent for publication**

602 Not applicable.

### 603 **Availability of data and materials**

604 Raw metagenomic data and assembled MAGs have been submitted to the European Nucleotide  
605 Archive (ENA) under the project PRJEB41762. All the code used can be found in  
606 <https://github.com/ArcticMicrobialEcology/Kilpisjarvi-MAGs>.

### 607 **Competing interests**

608 The authors declare that they have no competing interests.

### 609 **Funding**

610 This work was funded by the Academy of Finland (grants 314114 and 335354) and the  
611 University of Helsinki. SV was funded by the Microbiology and Biotechnology Doctoral  
612 Programme (MBDP). AMV was funded by the Academy of Finland (grant 286950), the Otto  
613 Malm Foundation, and the Gordon and Betty Moore Foundation (grant 8414). MEM was  
614 supported by the Academy of Finland (grants 314630 and 317054).

### 615 **Author contributions**

616 JH and ML designed the research; SV and JH performed nucleic acid extraction and  
617 metagenomic library preparation; AMV and MEM designed and performed the GHG flux  
618 measurements and analyses; ISP analysed the data and wrote the manuscript; EER and TOD  
619 contributed with the analyses; all authors contributed to the final version of the manuscript.

### 620 **Acknowledgements**

621 We would like to acknowledge CSC – IT Centre for Science for providing the necessary  
622 computing resources and Kimmo Mattila for IT support; the staff from the Kilpisjärvi Biological  
623 Station, Tanja Orpana, Aino Rutanen, Anniina Sarekoski, Johanna Kerttula, and the members  
624 of the BioGeoClimate Modelling Lab for assistance with fieldwork and soil characterization;  
625 Jillian Banfield and Christina Biasi for helpful discussion; Laura Cappelatti for proof-reading

626 the manuscript; Murat Eren, Sebastian Lücker, Donovan Parks, and Antonios Kioukis for tips,  
627 recommendations, and troubleshooting; and all anonymous reviewers who provided important  
628 insights to the original manuscript.

## 629 **References**

- 630 1. IPCC, editor. *Climate Change 2013: The Physical Science Basis. Contribution of Working*  
631 *Group I to the Fifth Assessment Report of the Intergovernmental Panel on Climate Change.*  
632 Cambridge: Cambridge University Press; 2013.
- 633 2. Tian H, Xu R, Canadell JG, Thompson RL, Winiwarter W, Suntharalingam P, et al. A  
634 comprehensive quantification of global nitrous oxide sources and sinks. *Nature.* 2020;586:248–  
635 56.
- 636 3. Repo ME, Susiluoto S, Lind SE, Jokinen S, Elsakov V, Biasi C, et al. Large N<sub>2</sub>O emissions  
637 from cryoturbated peat soil in tundra. *Nat Geosci.* 2009;2:189–92.
- 638 4. Marushchak ME, Pitkämäki A, Koponen H, Biasi C, Seppälä M, Martikainen PJ. Hot spots  
639 for nitrous oxide emissions found in different types of permafrost peatlands. *Glob Change Biol.*  
640 2011;17:2601–14.
- 641 5. Stewart KJ, Grogan P, Coxson DS, Siciliano SD. Topography as a key factor driving  
642 atmospheric nitrogen exchanges in arctic terrestrial ecosystems. *Soil Biol Biochem.* 2014;70:96–  
643 112.
- 644 6. Voigt C, Marushchak ME, Lamprecht RE, Jackowicz-Korczyński M, Lindgren A, Mastepanov  
645 M, et al. Increased nitrous oxide emissions from Arctic peatlands after permafrost thaw. *Proc*  
646 *Natl Acad Sci.* 2017;114:6238–43.
- 647 7. Voigt C, Marushchak ME, Abbott BW, Biasi C, Elberling B, Siciliano SD, et al. Nitrous oxide  
648 emissions from permafrost-affected soils. *Nat Rev Earth Environ.* 2020;1:420–34.
- 649 8. Schuur EAG, McGuire AD, Schädel C, Grosse G, Harden JW, Hayes DJ, et al. Climate change  
650 and the permafrost carbon feedback. *Nature.* 2015;520:171–9.
- 651 9. Hugelius G, Loisel J, Chadburn S, Jackson RB, Jones M, MacDonald G, et al. Large stocks of  
652 peatland carbon and nitrogen are vulnerable to permafrost thaw. *Proc Natl Acad Sci.*  
653 2020;117:20438–46.
- 654 10. Post E, Alley RB, Christensen TR, Macias-Fauria M, Forbes BC, Gooseff MN, et al. The  
655 polar regions in a 2°C warmer world. *Sci Adv.* 2019;5:eaaw9883.



- 656 11. Butterbach-Bahl K, Baggs EM, Dannenmann M, Kiese R, Zechmeister-Boltenstern S.  
657 Nitrous oxide emissions from soils: how well do we understand the processes and their controls?  
658 *Philos Trans R Soc B Biol Sci.* 2013;368:20130122.
- 659 12. Zumft WG. Cell biology and molecular basis of denitrification. *Microbiol Mol Biol Rev*  
660 *MMBR.* 1997;61:533–616.
- 661 13. Wallenstein MD, Myrold DD, Firestone M, Voytek M. Environmental controls on  
662 denitrifying communities and denitrification rates: insights from molecular methods. *Ecol Appl.*  
663 2006;16:2143–52.
- 664 14. Graf DRH, Jones CM, Hallin S. Intergenomic Comparisons Highlight Modularity of the  
665 Denitrification Pathway and Underpin the Importance of Community Structure for N<sub>2</sub>O  
666 Emissions. *PLoS ONE.* 2014;9:e114118.
- 667 15. Hallin S, Philippot L, Löffler FE, Sanford RA, Jones CM. Genomics and Ecology of Novel  
668 N<sub>2</sub>O-Reducing Microorganisms. *Trends Microbiol.* 2018;26:43–55.
- 669 16. Liu X-Y, Koba K, Koyama LA, Hobbie SE, Weiss MS, Inagaki Y, et al. Nitrate is an important  
670 nitrogen source for Arctic tundra plants. *Proc Natl Acad Sci.* 2018;115:3398–403.
- 671 17. Kou D, Yang G, Li F, Feng X, Zhang D, Mao C, et al. Progressive nitrogen limitation across  
672 the Tibetan alpine permafrost region. *Nat Commun.* 2020;11:3331.
- 673 18. Yergeau E, Kang S, He Z, Zhou J, Kowalchuk GA. Functional microarray analysis of  
674 nitrogen and carbon cycling genes across an Antarctic latitudinal transect. *ISME J.* 2007;1:163–  
675 79.
- 676 19. Yergeau E, Hogues H, Whyte LG, Greer CW. The functional potential of high Arctic  
677 permafrost revealed by metagenomic sequencing, qPCR and microarray analyses. *ISME J.*  
678 2010;4:1206–14.
- 679 20. Palmer K, Biasi C, Horn MA. Contrasting denitrifier communities relate to contrasting N<sub>2</sub>O  
680 emission patterns from acidic peat soils in arctic tundra. *ISME J.* 2012;6:1058–77.
- 681 21. Dai H-T, Zhu R-B, Sun B-W, Che C-S, Hou L-J. Effects of Sea Animal Activities on Tundra  
682 Soil Denitrification and nirS- and nirK-Encoding Denitrifier Community in Maritime  
683 Antarctica. *Front Microbiol.* 2020;11:573302.
- 684 22. Ortiz M, Bosch J, Coclet C, Johnson J, Lebre P, Salawu-Rotimi A, et al. Microbial Nitrogen  
685 Cycling in Antarctic Soils. *Microorganisms.* 2020;8:1442.
- 686 23. Brummell ME, Farrell RE, Siciliano SD. Greenhouse gas soil production and surface fluxes  
687 at a high arctic polar oasis. *Soil Biol Biochem.* 2012;52:1–12.

- 688 24. Chapuis-Lardy L, Wrage N, Metay A, Chotte J-L, Bernoux M. Soils, a sink for N<sub>2</sub>O? A  
689 review. *Glob Change Biol.* 2007;13:1–17.
- 690 25. Bakken LR, Bergaust L, Liu B, Frostegård Å. Regulation of denitrification at the cellular  
691 level: a clue to the understanding of N<sub>2</sub>O emissions from soils. *Philos Trans R Soc B Biol Sci.*  
692 2012;367:1226–34.
- 693 26. Philippot L, Andert J, Jones CM, Bru D, Hallin S. Importance of denitrifiers lacking the  
694 genes encoding the nitrous oxide reductase for N<sub>2</sub>O emissions from soil: role of denitrifier  
695 diversity for N<sub>2</sub>O fluxes. *Glob Change Biol.* 2011;17:1497–504.
- 696 27. Sanford RA, Wagner DD, Wu Q, Chee-Sanford JC, Thomas SH, Cruz-Garcia C, et al.  
697 Unexpected nondenitrifier nitrous oxide reductase gene diversity and abundance in soils. *Proc*  
698 *Natl Acad Sci.* 2012;109:19709–14.
- 699 28. Jones CM, Graf DR, Bru D, Philippot L, Hallin S. The unaccounted yet abundant nitrous  
700 oxide-reducing microbial community: a potential nitrous oxide sink. *ISME J.* 2013;7:417–26.
- 701 29. Jones CM, Spor A, Brennan FP, Breuil M-C, Bru D, Lemanceau P, et al. Recently identified  
702 microbial guild mediates soil N<sub>2</sub>O sink capacity. *Nat Clim Change.* 2014;4:801–5.
- 703 30. Anantharaman K, Brown CT, Hug LA, Sharon I, Castelle CJ, Probst AJ, et al. Thousands  
704 of microbial genomes shed light on interconnected biogeochemical processes in an aquifer  
705 system. *Nat Commun.* 2016;7:13219.
- 706 31. Lilja EE, Johnson DR. Segregating metabolic processes into different microbial cells  
707 accelerates the consumption of inhibitory substrates. *ISME J.* 2016;10:1568–78.
- 708 32. Yu T, Zhuang Q. Quantifying global N<sub>2</sub>O emissions from natural ecosystem soils using trait-  
709 based biogeochemistry models. *Biogeosciences.* 2019;16:207–22.
- 710 33. Rappé MS, Giovannoni SJ. The Uncultured Microbial Majority. *Annu Rev Microbiol.*  
711 2003;57:369–94.
- 712 34. Steen AD, Crits-Christoph A, Carini P, DeAngelis KM, Fierer N, Lloyd KG, et al. High  
713 proportions of bacteria and archaea across most biomes remain uncultured. *ISME J.*  
714 2019;13:3126–30.
- 715 35. Mackelprang R, Waldrop MP, DeAngelis KM, David MM, Chavarria KL, Blazewicz SJ, et  
716 al. Metagenomic analysis of a permafrost microbial community reveals a rapid response to thaw.  
717 *Nature.* 2011;480:368–71.

- 718 36. Hultman J, Waldrop MP, Mackelprang R, David MM, McFarland J, Blazewicz SJ, et al.  
719 Multi-omics of permafrost, active layer and thermokarst bog soil microbiomes. *Nature*.  
720 2015;521:208–12.
- 721 37. Woodcroft BJ, Singleton CM, Boyd JA, Evans PN, Emerson JB, Zayed AAF, et al. Genome-  
722 centric view of carbon processing in thawing permafrost. *Nature*. 2018;560:49–54.
- 723 38. Pirinen P, Simola H, Aalto J, Kaukoranta J-P, Karlsson P, Ruuhela R. Climatological  
724 statistics of Finland 1981–2010. Helsinki: Finnish Meteorological Institute; 2012.
- 725 39. Livingston GP, Hutchinson GL. Enclosure-based measurement of trace gas exchange:  
726 applications and sources of error. In: *Biogenic trace gases: Measuring emissions from soil and*  
727 *water*. Oxford, United Kingdom: Blackwell Science. p. 14–51.
- 728 40. Viitamäki S, Pessi IS, Virkkala A-M, Niittynen P, Kempainen J, Eronen-Rasimus E, et al.  
729 The activity and functions of subarctic soil microbial communities vary across vegetation types.  
730 *bioRxiv*. 2021. <https://doi.org/10.1101/2021.06.12.448001>.
- 731 41. Ewels P, Magnusson M, Lundin S, Käller M. MultiQC: summarize analysis results for  
732 multiple tools and samples in a single report. *Bioinformatics*. 2016;32:3047–8.
- 733 42. Martin M. Cutadapt removes adapter sequences from high-throughput sequencing reads.  
734 *EMBnet.journal*. 2011;17:10.
- 735 43. Leger A, Leonardi T. pycoQC, interactive quality control for Oxford Nanopore Sequencing.  
736 *J Open Source Softw*. 2019;4:1236.
- 737 44. Bengtsson-Palme J, Hartmann M, Eriksson KM, Pal C, Thorell K, Larsson DGJ, et al.  
738 METAXA 2: improved identification and taxonomic classification of small and large subunit  
739 rRNA in metagenomic data. *Mol Ecol Resour*. 2015;15:1403–14.
- 740 45. Quast C, Pruesse E, Yilmaz P, Gerken J, Schweer T, Yarza P, et al. The SILVA ribosomal  
741 RNA gene database project: improved data processing and web-based tools. *Nucleic Acids Res*.  
742 2012;41:D590–6.
- 743 46. Schloss PD, Westcott SL, Ryabin T, Hall JR, Hartmann M, Hollister EB, et al. Introducing  
744 mothur: Open-Source, Platform-Independent, Community-Supported Software for Describing  
745 and Comparing Microbial Communities. *Appl Environ Microbiol*. 2009;75:7537–41.
- 746 47. Wang Q, Garrity GM, Tiedje JM, Cole JR. Naïve Bayesian Classifier for Rapid Assignment  
747 of rRNA Sequences into the New Bacterial Taxonomy. *Appl Environ Microbiol*. 2007;73:5261–  
748 7.

- 749 48. Li D, Liu C-M, Luo R, Sadakane K, Lam T-W. MEGAHIT: an ultra-fast single-node solution  
750 for large and complex metagenomics assembly via succinct de Bruijn graph. *Bioinformatics*.  
751 2015;31:1674–6.
- 752 49. Kolmogorov M, Bickhart DM, Behsaz B, Gurevich A, Rayko M, Shin SB, et al. metaFlye:  
753 scalable long-read metagenome assembly using repeat graphs. *Nat Methods*. 2020.  
754 <https://doi.org/10.1038/s41592-020-00971-x>.
- 755 50. Langmead B, Salzberg SL. Fast gapped-read alignment with Bowtie 2. *Nat Methods*.  
756 2012;9:357–9.
- 757 51. Li H, Handsaker B, Wysoker A, Fennell T, Ruan J, Homer N, et al. The Sequence  
758 Alignment/Map format and SAMtools. *Bioinformatics*. 2009;25:2078–9.
- 759 52. Walker BJ, Abeel T, Shea T, Priest M, Abouelliel A, Sakthikumar S, et al. Pilon: An  
760 Integrated Tool for Comprehensive Microbial Variant Detection and Genome Assembly  
761 Improvement. *PLoS ONE*. 2014;9:e112963.
- 762 53. Mikheenko A, Saveliev V, Gurevich A. MetaQUAST: evaluation of metagenome assemblies.  
763 *Bioinformatics*. 2016;32:1088–90.
- 764 54. Eren AM, Esen ÖC, Quince C, Vineis JH, Morrison HG, Sogin ML, et al. Anvi'o: an advanced  
765 analysis and visualization platform for 'omics data. *PeerJ*. 2015;3:e1319.
- 766 55. Hyatt D, Chen G-L, LoCascio PF, Land ML, Larimer FW, Hauser LJ. Prodigal: prokaryotic  
767 gene recognition and translation initiation site identification. *BMC Bioinformatics*.  
768 2010;11:119.
- 769 56. Eddy SR. Accelerated Profile HMM Searches. *PLoS Comput Biol*. 2011;7:e1002195.
- 770 57. Buchfink B, Xie C, Huson DH. Fast and sensitive protein alignment using DIAMOND. *Nat*  
771 *Methods*. 2015;12:59–60.
- 772 58. Parks DH, Chuvochina M, Waite DW, Rinke C, Skarszewski A, Chaumeil P-A, et al. A  
773 standardized bacterial taxonomy based on genome phylogeny substantially revises the tree of  
774 life. *Nat Biotechnol*. 2018;36:996–1004.
- 775 59. Parks DH, Chuvochina M, Chaumeil P-A, Rinke C, Mussig AJ, Hugenholtz P. A complete  
776 domain-to-species taxonomy for Bacteria and Archaea. *Nat Biotechnol*. 2020.  
777 <https://doi.org/10.1038/s41587-020-0501-8>.
- 778 60. Alneberg J, Bjarnason BS, de Bruijn I, Schirmer M, Quick J, Ijaz UZ, et al. Binning  
779 metagenomic contigs by coverage and composition. *Nat Methods*. 2014;11:1144–6.

- 780 61. Bowers RM, Kyrpides NC, Stepanauskas R, Harmon-Smith M, Doud D, Reddy TBK, et al.  
781 Minimum information about a single amplified genome (MISAG) and a metagenome-assembled  
782 genome (MIMAG) of bacteria and archaea. *Nat Biotechnol.* 2017;35:725–31.
- 783 62. Aramaki T, Blanc-Mathieu R, Endo H, Ohkubo K, Kanehisa M, Goto S, et al. KofamKOALA:  
784 KEGG Ortholog assignment based on profile HMM and adaptive score threshold.  
785 *Bioinformatics.* 2020;36:2251–2.
- 786 63. Katoh K, Standley DM. MAFFT Multiple Sequence Alignment Software Version 7:  
787 Improvements in Performance and Usability. *Mol Biol Evol.* 2013;30:772–80.
- 788 64. Okonechnikov K, Golosova O, Fursov M. Unipro UGENE: a unified bioinformatics toolkit.  
789 *Bioinformatics.* 2012;28:1166–7.
- 790 65. Decleyre H, Heylen K, Tytgat B, Willems A. Highly diverse nirK genes comprise two major  
791 clades that harbour ammonium-producing denitrifiers. *BMC Genomics.* 2016;17:155.
- 792 66. Li Y, Bali S, Borg S, Katzmann E, Ferguson SJ, Schuler D. Cytochrome cd1 Nitrite  
793 Reductase NirS Is Involved in Anaerobic Magnetite Biomineralization in *Magnetospirillum*  
794 *gryphiswaldense* and Requires NirN for Proper d1 Heme Assembly. *J Bacteriol.* 2013;195:4297–  
795 309.
- 796 67. Heylen K, Keltjens J. Redundancy and modularity in membrane-associated dissimilatory  
797 nitrate reduction in *Bacillus*. *Front Microbiol.* 2012;3.
- 798 68. Price MN, Dehal PS, Arkin AP. FastTree 2 – Approximately Maximum-Likelihood Trees for  
799 Large Alignments. *PLoS ONE.* 2010;5:e9490.
- 800 69. Woodcroft BJ. CoverM. 2021.
- 801 70. Li H. Minimap and miniasm: fast mapping and de novo assembly for noisy long sequences.  
802 *Bioinformatics.* 2016;32:2103–10.
- 803 71. Chaumeil P-A, Mussig AJ, Hugenholtz P, Parks DH. GTDB-Tk: a toolkit to classify genomes  
804 with the Genome Taxonomy Database. *Bioinformatics.* 2019;:btz848.
- 805 72. Edgar RC. MUSCLE: multiple sequence alignment with high accuracy and high throughput.  
806 *Nucleic Acids Res.* 2004;32:1792–7.
- 807 73. Zhang H, Yohe T, Huang L, Entwistle S, Wu P, Yang Z, et al. dbCAN2: a meta server for  
808 automated carbohydrate-active enzyme annotation. *Nucleic Acids Res.* 2018;46:W95–101.

- 809 74. Jain C, Rodriguez-R LM, Phillippy AM, Konstantinidis KT, Aluru S. High throughput ANI  
810 analysis of 90K prokaryotic genomes reveals clear species boundaries. *Nat Commun.*  
811 2018;9:5114.
- 812 75. le Roux PC, Aalto J, Luoto M. Soil moisture's underestimated role in climate change impact  
813 modelling in low-energy systems. *Glob Change Biol.* 2013;19:2965–75.
- 814 76. Niittynen P, Heikkinen RK, Aalto J, Guisan A, Kemppinen J, Luoto M. Fine-scale tundra  
815 vegetation patterns are strongly related to winter thermal conditions. *Nat Clim Change.* 2020.  
816 <https://doi.org/10.1038/s41558-020-00916-4>.
- 817 77. le Roux PC, Pellissier L, Wisz MS, Luoto M. Incorporating dominant species as proxies for  
818 biotic interactions strengthens plant community models. *J Ecol.* 2014;102:767–75.
- 819 78. Kemppinen J, Niittynen P, Aalto J, le Roux PC, Luoto M. Water as a resource, stress and  
820 disturbance shaping tundra vegetation. *Oikos.* 2019;128:811–22.
- 821 79. Borisov VB, Gennis RB, Hemp J, Verkhovsky MI. The cytochrome bd respiratory oxygen  
822 reductases. *Biochim Biophys Acta BBA - Bioenerg.* 2011;1807:1398–413.
- 823 80. Giuffrè A, Borisov VB, Arese M, Sarti P, Forte E. Cytochrome bd oxidase and bacterial  
824 tolerance to oxidative and nitrosative stress. *Biochim Biophys Acta BBA - Bioenerg.*  
825 2014;1837:1178–87.
- 826 81. Dinamarca MA, Ruiz-Manzano A, Rojo F. Inactivation of Cytochrome *o* Ubiquinol Oxidase  
827 Relieves Catabolic Repression of the *Pseudomonas putida* GPo1 Alkane Degradation Pathway.  
828 *J Bacteriol.* 2002;184:3785–93.
- 829 82. Bueno E, Mesa S, Bedmar EJ, Richardson DJ, Delgado MJ. Bacterial Adaptation of  
830 Respiration from Oxidic to Microoxic and Anoxic Conditions: Redox Control. *Antioxid Redox*  
831 *Signal.* 2012;16:819–52.
- 832 83. Makhalanyane TP, Van Goethem MW, Cowan DA. Microbial diversity and functional  
833 capacity in polar soils. *Curr Opin Biotechnol.* 2016;38:159–66.
- 834 84. Diamond S, Andeer PF, Li Z, Crits-Christoph A, Burstein D, Anantharaman K, et al.  
835 Mediterranean grassland soil C–N compound turnover is dependent on rainfall and depth, and  
836 is mediated by genomically divergent microorganisms. *Nat Microbiol.* 2019;4:1356–67.
- 837 85. Sun X, Ward BB. Novel metagenome-assembled genomes involved in the nitrogen cycle from  
838 a Pacific oxygen minimum zone. *ISME Commun.* 2021;1:26.

- 839 86. Westergaard-Nielsen A, Balstrøm T, Treier UA, Normand S, Elberling B. Estimating  
840 meltwater retention and associated nitrate redistribution during snowmelt in an Arctic tundra  
841 landscape. *Environ Res Lett.* 2020;15:034025.
- 842 87. Delgado-Baquerizo M, Oliverio AM, Brewer TE, Benavent-González A, Eldridge DJ,  
843 Bardgett RD, et al. A global atlas of the dominant bacteria found in soil. *Science.* 2018;359:320–  
844 5.
- 845 88. Männistö MK, Kurhela E, Tirola M, Häggblom MM. Acidobacteria dominate the active  
846 bacterial communities of Arctic tundra with widely divergent winter-time snow accumulation  
847 and soil temperatures. *FEMS Microbiol Ecol.* 2013;84:47–59.
- 848 89. Losey NA, Stevenson BS, Busse H-J, Damsté JSS, Rijpstra WIC, Rudd S, et al.  
849 *Thermoanaerobaculum aquaticum* gen. nov., sp. nov., the first cultivated member of  
850 Acidobacteria subdivision 23, isolated from a hot spring. *Int J Syst Evol Microbiol.* 2013;63  
851 Pt\_11:4149–57.
- 852 90. Lycus P, Lovise Bøthun K, Bergaust L, Peele Shapleigh J, Reier Bakken L, Frostegård Å.  
853 Phenotypic and genotypic richness of denitrifiers revealed by a novel isolation strategy. *ISME*  
854 *J.* 2017;11:2219–32.
- 855 91. Costello EK, Schmidt SK. Microbial diversity in alpine tundra wet meadow soil: novel  
856 Chloroflexi from a cold, water-saturated environment. *Environ Microbiol.* 2006;8:1471–86.
- 857 92. Davis KER, Sangwan P, Janssen PH. Acidobacteria, Rubrobacteridae and Chloroflexi are  
858 abundant among very slow-growing and mini-colony-forming soil bacteria. *Environ Microbiol.*  
859 2011;13:798–805.
- 860 93. Park D, Kim H, Yoon S. Nitrous Oxide Reduction by an Obligate Aerobic Bacterium,  
861 *Gemmatimonas aurantiaca* Strain T-27. *Appl Environ Microbiol.* 2017;83.
- 862 94. Liu B, Frostegård Å, Bakken LR. Impaired Reduction of N<sub>2</sub>O to N<sub>2</sub> in Acid Soils Is Due to  
863 a Posttranscriptional Interference with the Expression of *nosZ*. *mBio.* 2014;5.
- 864 95. Samad MS, Biswas A, Bakken LR, Clough TJ, de Klein CAM, Richards KG, et al.  
865 Phylogenetic and functional potential links pH and N<sub>2</sub>O emissions in pasture soils. *Sci Rep.*  
866 2016;6:35990.
- 867 96. Palmer K, Horn MA. Denitrification Activity of a Remarkably Diverse Fen Denitrifier  
868 Community in Finnish Lapland Is N-Oxide Limited. *PLOS ONE.* 2015;10:e0123123.
- 869 97. Smith K. The potential for feedback effects induced by global warming on emissions of  
870 nitrous oxide by soils. *Glob Change Biol.* 1997;3:327–38.

- 871 98. Kåresdotter E, Destouni G, Ghajarnia N, Hugelius G, Kalantari Z. Mapping the  
872 Vulnerability of Arctic Wetlands to Global Warming. *Earths Future*. 2021;9.



873 **Supplementary Figures**

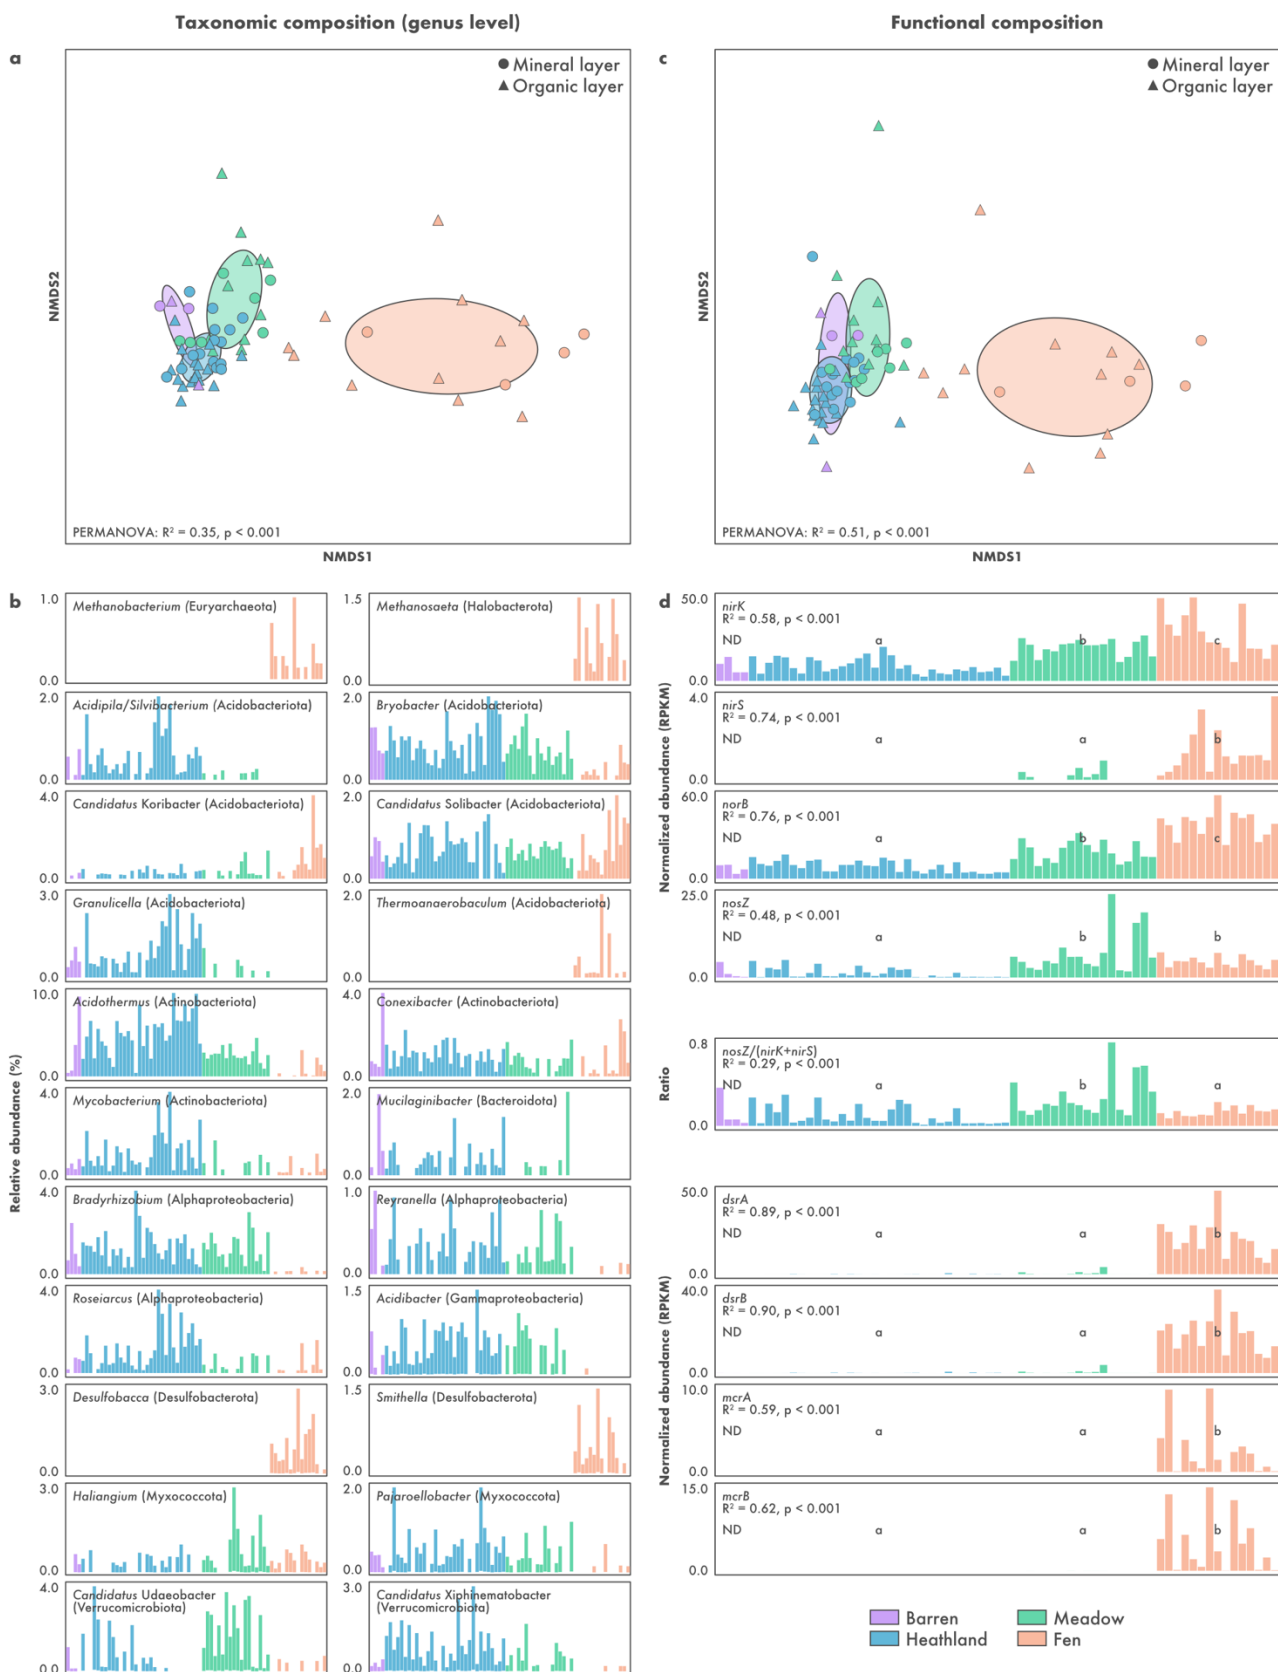

874 **(Previous page) Suppl. Fig. S1 | The microbial diversity of Kilpisjärvi soils as seen**  
875 **using a gene-centric approach.** Taxonomic composition was computed based on the  
876 annotation of unassembled SSU rRNA gene sequences against the SILVA database. Functional  
877 annotation was done by searching assembled genes against the KOfam database. The  
878 annotation of putative denitrification genes was confirmed using a phylogenetic approach. **a, c)**  
879 Non-metric multidimensional scaling (NMDS) of taxonomic and functional community  
880 structure, respectively. Differences between the ecosystems were assessed using permutational  
881 ANOVA (PERMANOVA). **b)** Abundance profile of the five most abundant genera in each  
882 ecosystem. **d)** Abundance profile of marker genes for denitrification, sulfate reduction, and  
883 methanogenesis. Ecosystems followed by different letters are significantly different (one-way  
884 ANOVA,  $p < 0.05$ ). Samples from barren soils were not included in the ANOVA procedure due  
885 to the limited number of samples (ND: not determined).

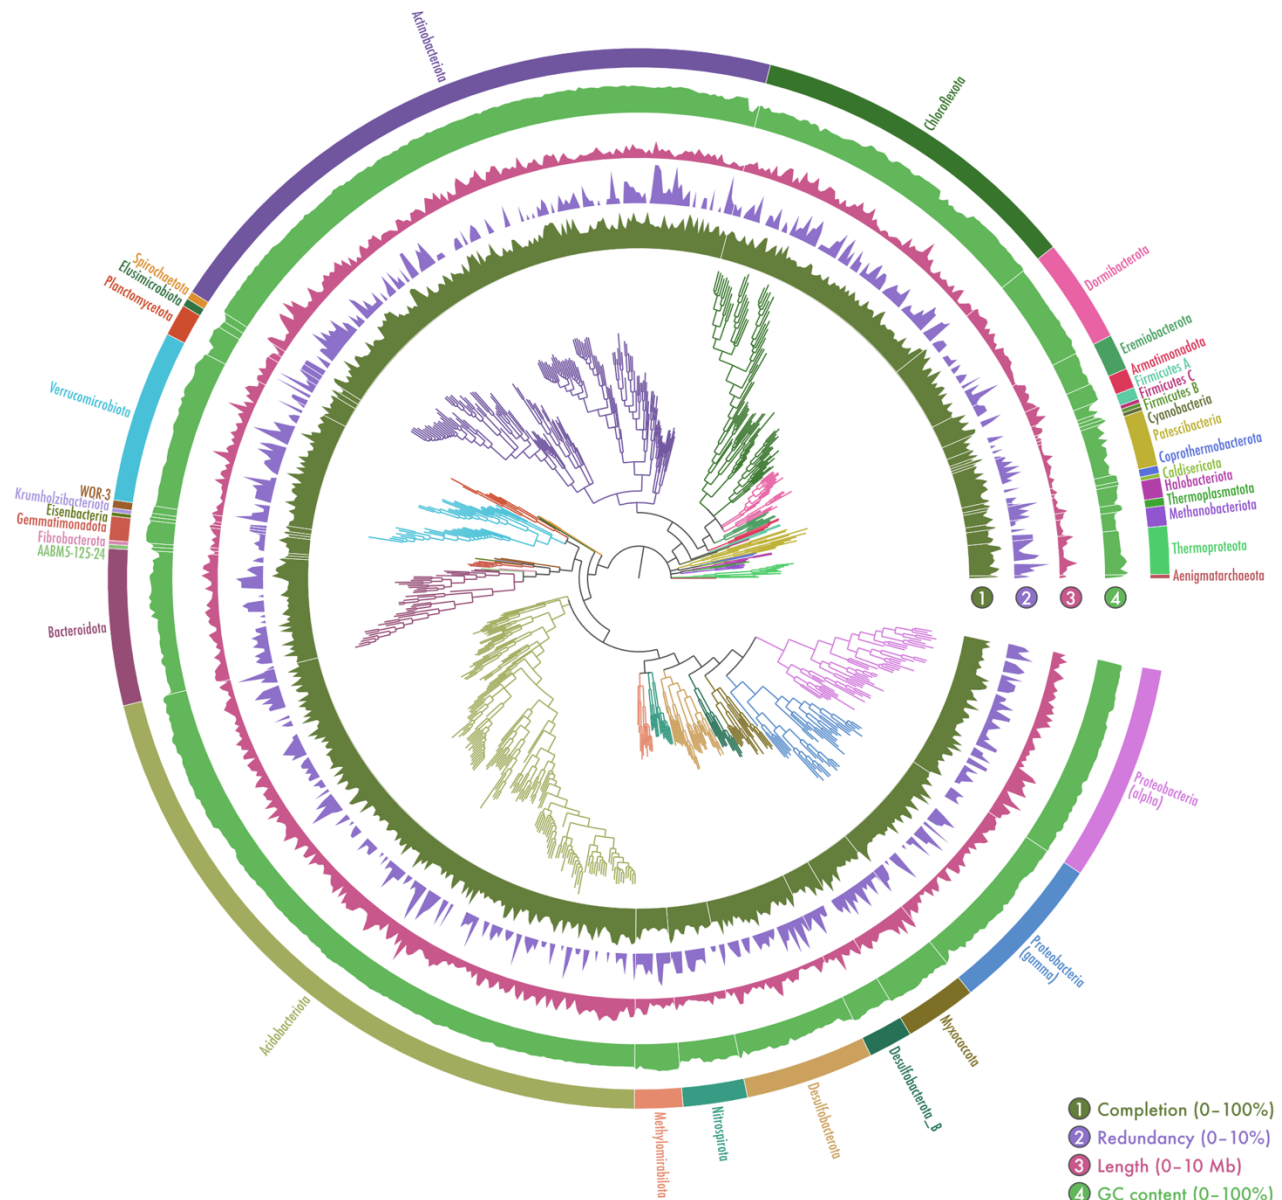

886 **Suppl. Fig. S2 | Genome-resolved metagenomics of tundra soils.** Phylogenomic  
887 placement and assembly statistics of 796 metagenome-assembled genomes (MAGs) recovered  
888 from soils in Kilpisjärvi, northern Finland. Unrooted maximum likelihood tree based on  
889 concatenated alignments of amino acid sequences from 122 archaeal and 120 bacterial single-  
890 copy genes. Additional information about the MAGs can be found in **Suppl. Table S2**.



891 **(Previous page) Suppl. Fig. S3 | Overview of the microbial diversity in Kilpisjärvi**  
892 **soils based on a genome-resolved approach. a)** Number of metagenome-assembled  
893 genomes (MAGs) shared between the different ecosystems. **b)** Number of detected MAGs across  
894 the ecosystems. **c)** Relative abundance of the ten most abundant MAGs in each ecosystem,  
895 computed as a proportion of reads mapping to each MAG. **d)** Metabolic potential of the MAGs  
896 based on the annotation of genes against the KOfam database. Bar plots represent the  
897 proportion of MAGs in each phylum with complete pathways, i.e., containing  $\geq 75\%$  of the genes  
898 in the pathway. Boxplots of carbohydrate-active enzymes (CAZymes) show the number of  
899 different enzyme types identified in each MAG.

■ nirK  
■ norB  
■ nosZ

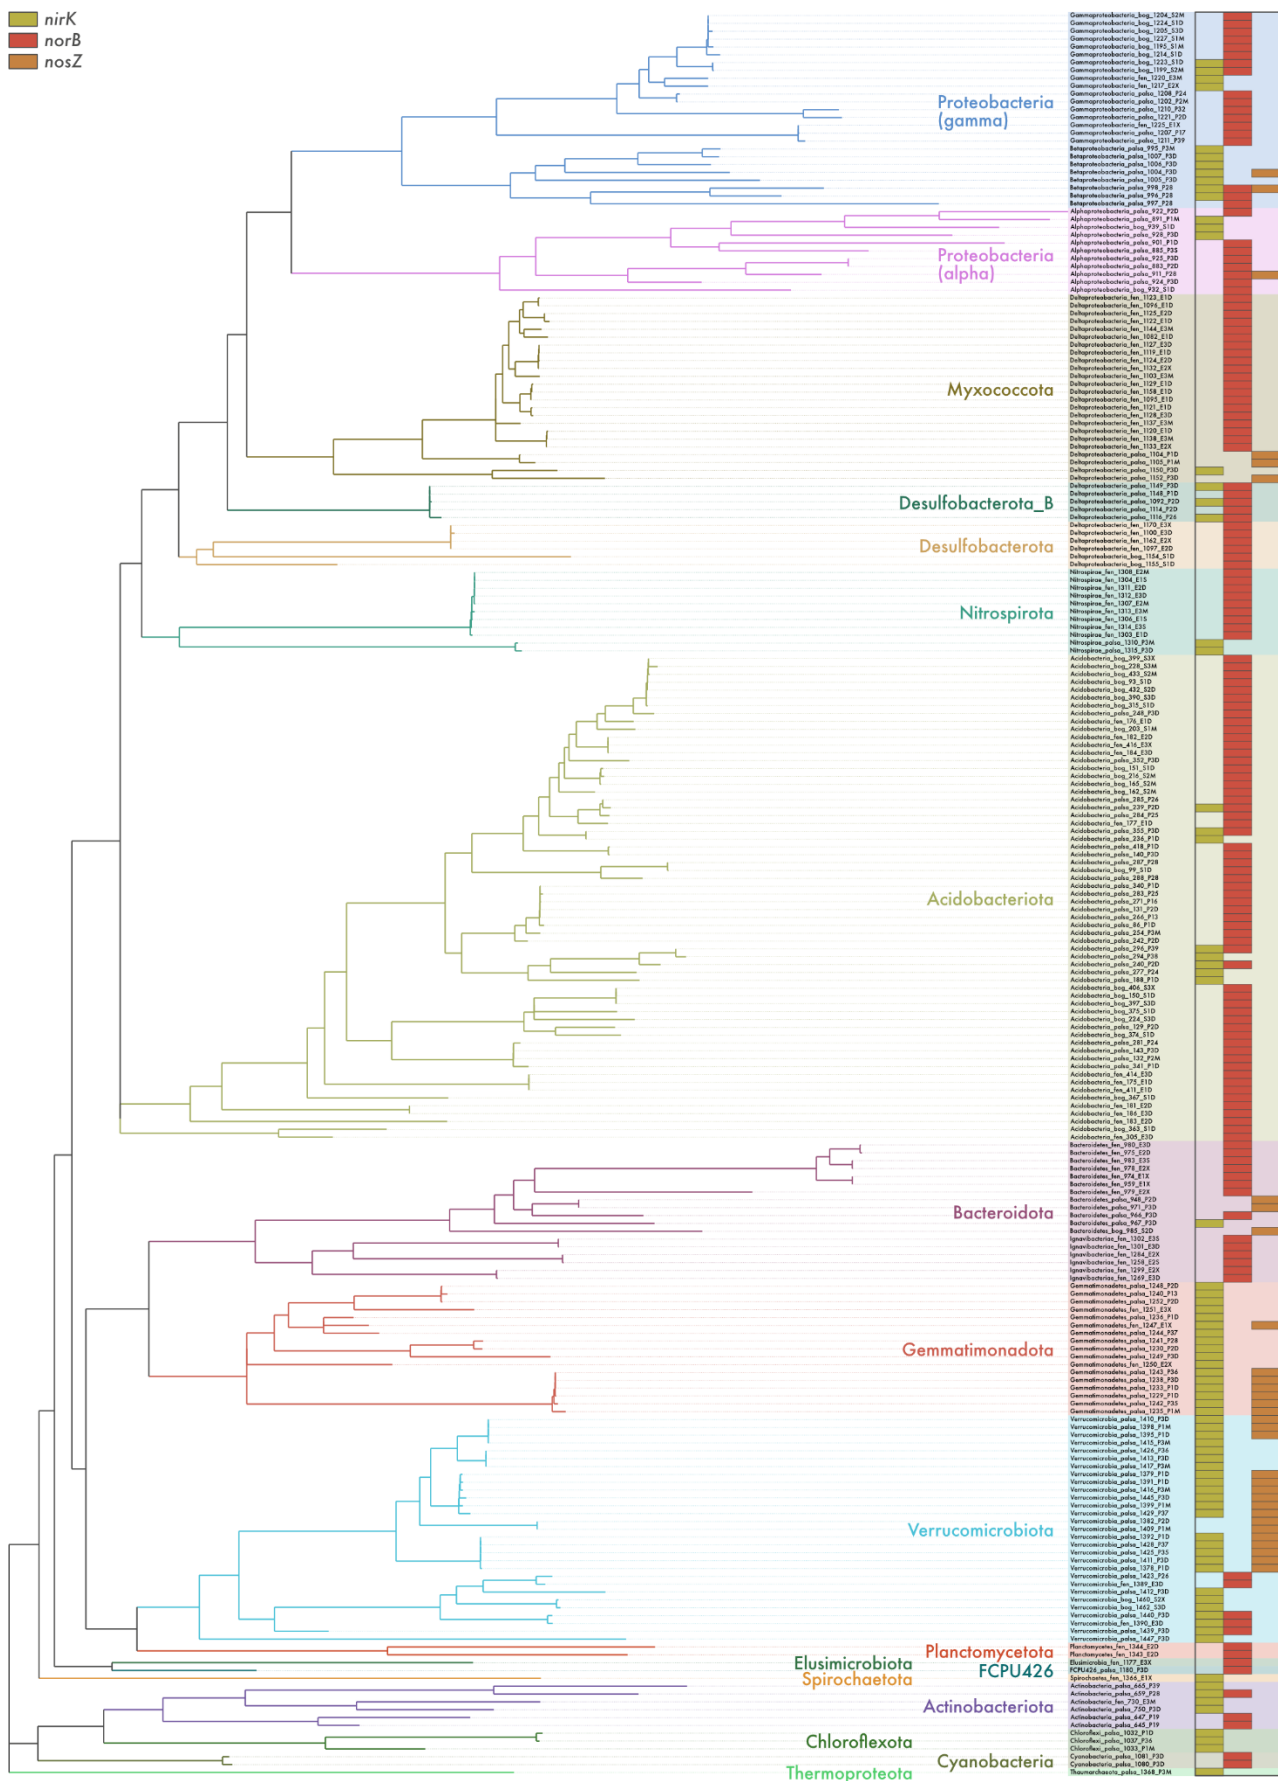

900 **(Previous page) Suppl. Fig. S4 | Metabolic potential for denitrification in Stordalen**  
901 **Mire soils.** Distribution of denitrification genes across 225 metagenome-assembled genomes  
902 (MAGs) from permafrost peatland, bog, and fen soils in Stordalen Mire, northern Sweden. Genes  
903 encoding the nitrite (*nirK*), nitric oxide (*norB*), and nitrous oxide (*nosZ*) reductases were  
904 annotated using a three-step approach including (1) identification using hidden Markov models  
905 from the KOfam database, (2) manual inspection for the presence of conserved residues at  
906 positions associated with the binding of co-factors and active sites, and (3) phylogenetic analyses  
907 along with sequences from archaeal and bacterial genomes. Phylogenomic analysis of MAGs  
908 was done based on concatenated alignments of amino acid sequences from 122 archaeal and 120  
909 bacterial single-copy genes.

a

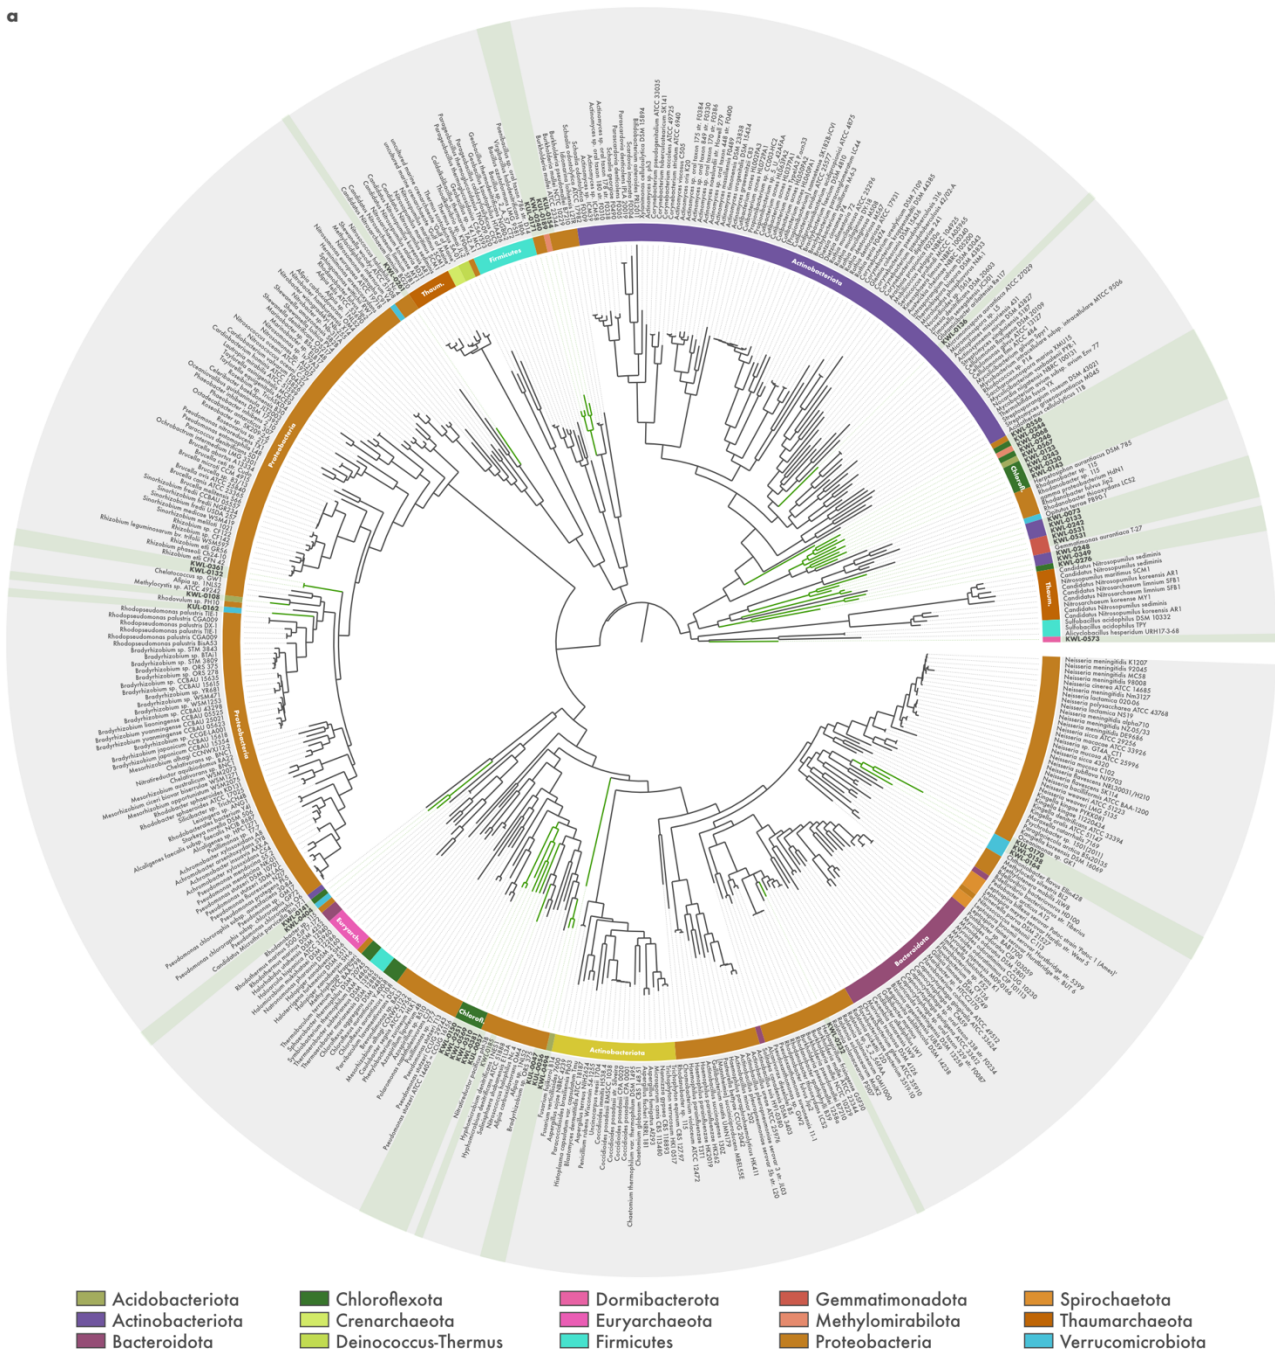

910 **Suppl. Fig. S5 | Phylogeny of a) *nirK*, b) *nirS*, c) *norB*, and d) *nosZ* sequences from**  
 911 **metagenome-assembled genomes (MAGs) recovered from tundra soils in Kilpisjärvi,**  
 912 **northern Finland.** Midpoint-rooted maximum-likelihood trees of translated sequences from  
 913 Kilpisjärvi MAGs (highlighted) along with reference sequences from archaeal and bacterial  
 914 genomes.



b

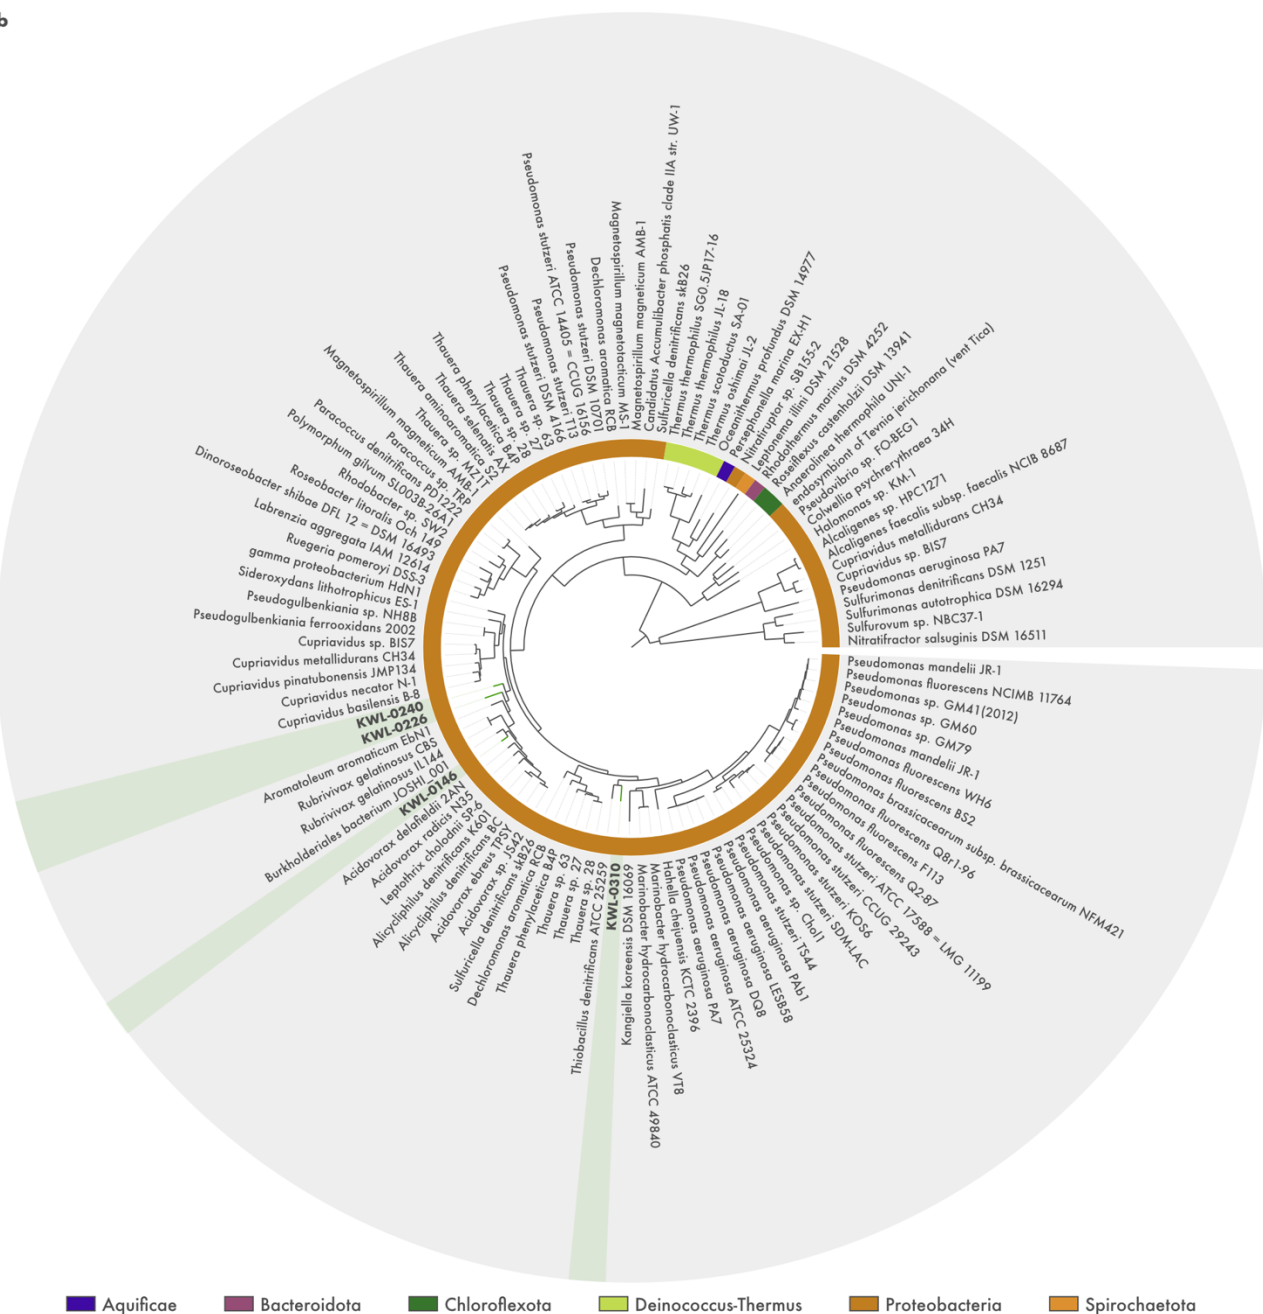

915 **Suppl. Fig. S5 (continued) | Phylogeny of a) *nirK*, b) *nirS*, c) *norB*, and d) *nosZ***  
 916 **sequences from metagenome-assembled genomes (MAGs) recovered from tundra**  
 917 **soils in Kilpisjärvi, northern Finland.** Midpoint-rooted maximum-likelihood trees of  
 918 translated sequences from Kilpisjärvi MAGs (highlighted) along with reference sequences from  
 919 archaeal and bacterial genomes.

c

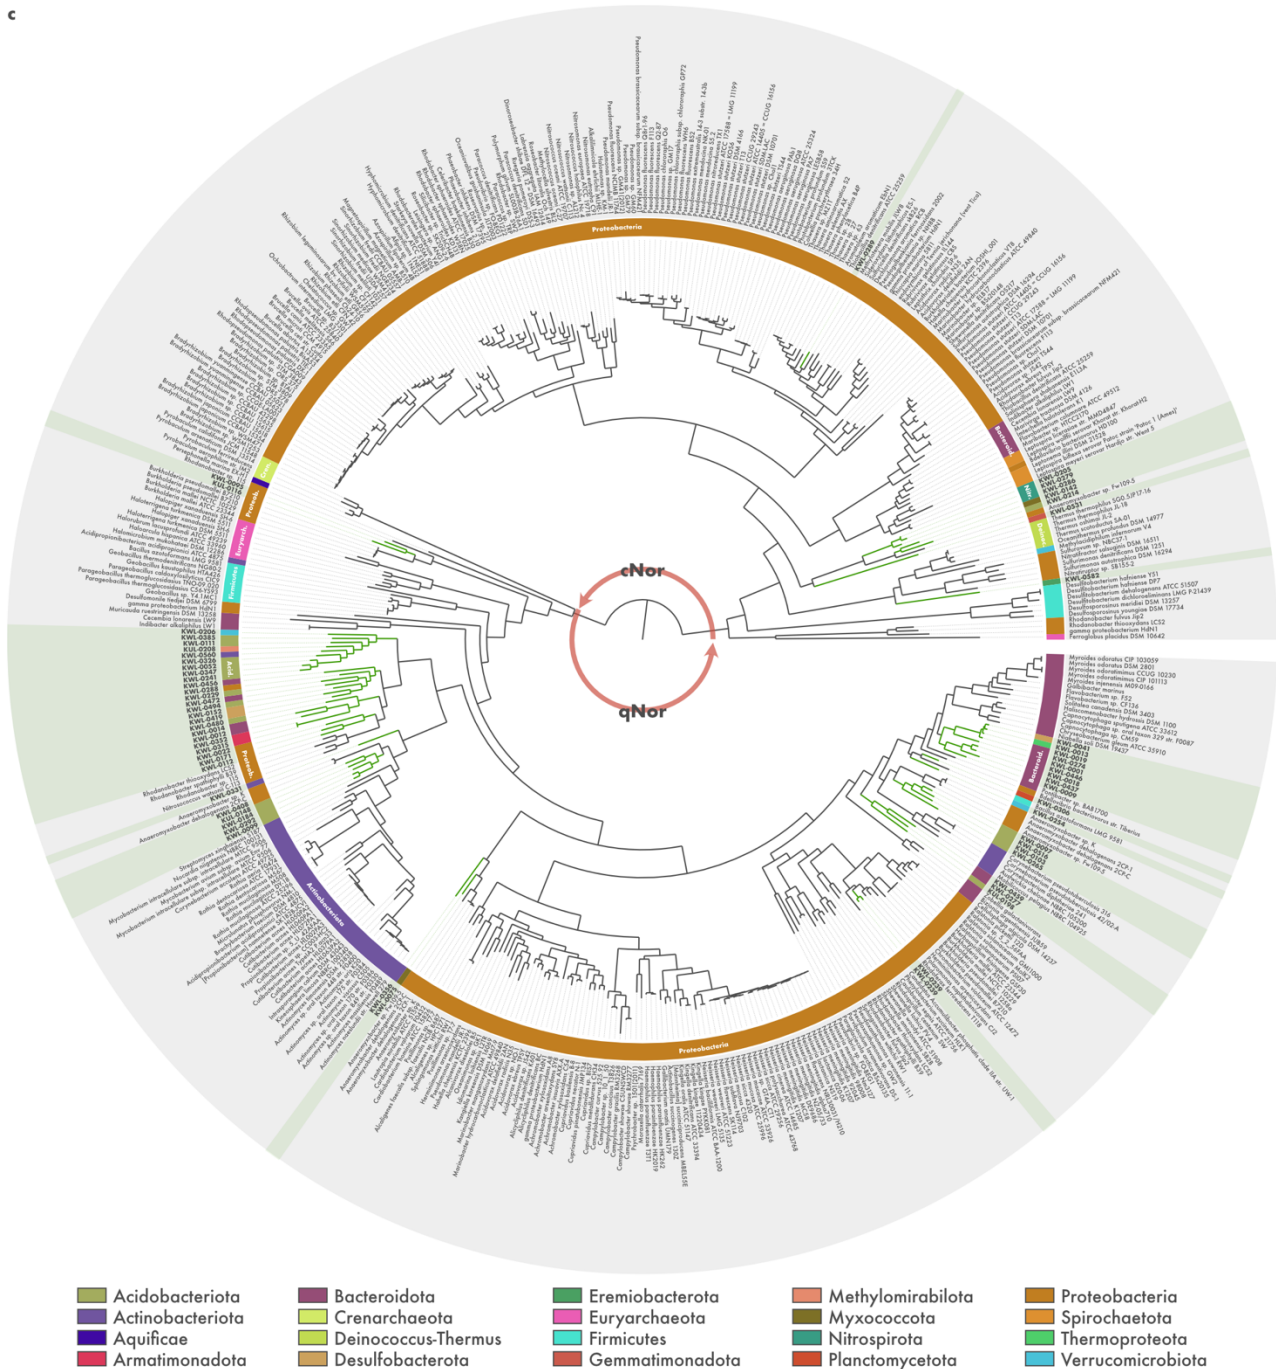

920 **Suppl. Fig. S5 (continued) | Phylogeny of a) *nirK*, b) *nirS*, c) *norB*, and d) *nosZ***  
 921 **sequences from metagenome-assembled genomes (MAGs) recovered from tundra**  
 922 **soils in Kilpisjärvi, northern Finland. Midpoint-rooted maximum-likelihood trees of**  
 923 **translated sequences from Kilpisjärvi MAGs (highlighted) along with reference sequences from**  
 924 **archaeal and bacterial genomes.**

d

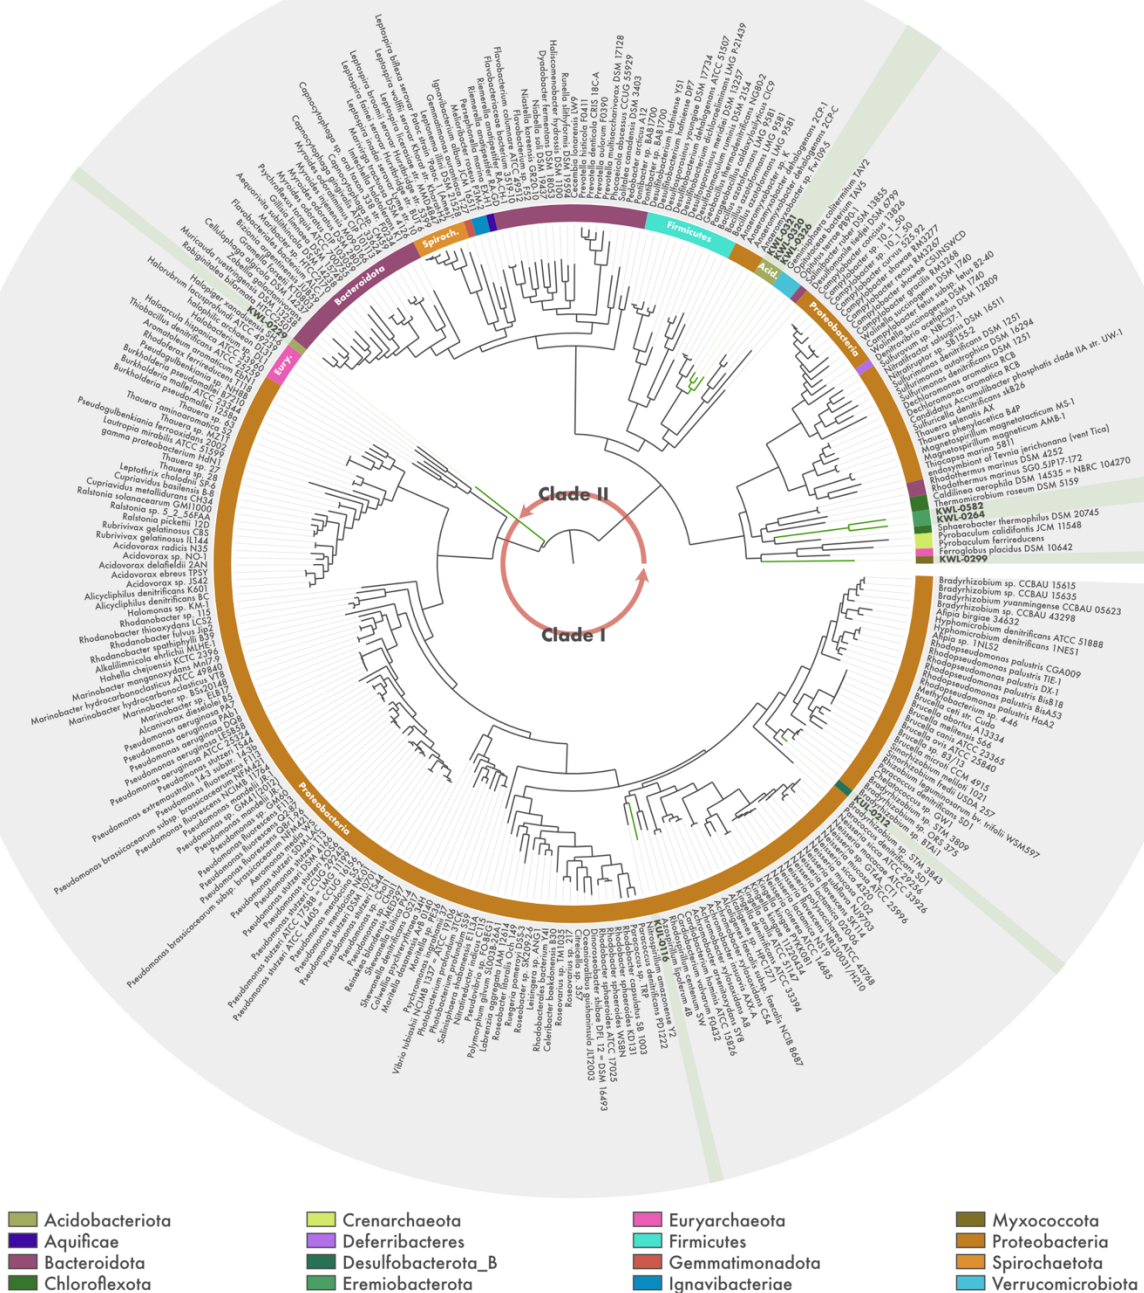

925 **Suppl. Fig. S5 (continued) | Phylogeny of a) *nirK*, b) *nirS*, c) *norB*, and d) *nosZ***  
 926 **sequences from metagenome-assembled genomes (MAGs) recovered from tundra**  
 927 **soils in Kilpisjärvi, northern Finland. Midpoint-rooted maximum-likelihood trees of**  
 928 **translated sequences from Kilpisjärvi MAGs (highlighted) along with reference sequences from**  
 929 **archaeal and bacterial genomes.**
